# Supplementary material for: Solution [2 + 2] photopolymerization of biomass-derived nonrigid biscinnamate monomers enabled by energy transfer catalysis
Source: Royal Society of Chemistry journal article supplement (doi:10.1039/d2py00161f), 2022-01-01
Supplement: d2py00161f1.pdf [file d2py00161f1.pdf]

## Supplementary Information

### **Solution [2 + 2] photopolymerization of biomass-derived nonrigid biscinnamate monomers enabled by energy transfer catalysis**

Yu Jiang,<sup>1</sup> Qiang Ma,<sup>1</sup> Xun Zhang,<sup>1</sup> Jun-Fang Li,<sup>2</sup> and Saihu Liao\*<sup>1,3</sup>

<sup>1</sup>Key Laboratory of Molecule Synthesis and Function Discovery (Fujian Province University),  
State Key Laboratory of Photocatalysis on Energy and Environment, College of Chemistry, Fuzhou  
University, Fuzhou 350108, China.

<sup>2</sup>State Key Laboratory of Organometallic Chemistry, Shanghai Institute of Organic Chemistry,  
Chinese Academy of Sciences, University of Chinese Academy of Sciences, 345 Lingling Road,  
Shanghai 200032, China.

<sup>3</sup>Beijing National Laboratory of Molecular Science (BNLMS), Beijing 100190, China.

## Table of Contents

|     |                                                           |    |
|-----|-----------------------------------------------------------|----|
| 1.  | General Methods.....                                      | 3  |
| 2.  | General Polymerization Procedures.....                    | 4  |
| 3.  | Preparation of Dicinnamates Monomers .....                | 6  |
| 4.  | General Dimerization Procedures of Ethyl Cinnamates ..... | 9  |
| 5.  | General Calculating Method for Monomer Conversion .....   | 9  |
| 6.  | Monomer Concentration and Catalyst Dosage Screen .....    | 10 |
| 7.  | Polymerization Solvent Screen .....                       | 12 |
| 8.  | Dependence of Polymerization Result on Time .....         | 13 |
| 9.  | GC-MS Spectra of Dimerization of Ethyl Cinnamates.....    | 15 |
| 10. | GPC Analysis Details .....                                | 16 |
| 11. | <sup>1</sup> H and <sup>13</sup> C NMR Spectra .....      | 32 |
| 12. | Thermal Stability Analyses.....                           | 43 |
| 13. | Preparation of Polymer Thin Films.....                    | 44 |
| 14. | Tensile Properties and Process of Polymer Films.....      | 44 |
| 15. | Reference .....                                           | 45 |

## 1. General Methods

Unless stated otherwise, all polymerization were carried out under an atmosphere of argon using standard Schlenk techniques. All solvents and reagents were obtained from commercial sources and were purified according to standard procedures before use. Chromatographic purification of monomers was accomplished by flash chromatography on silica gel. The monomers spots on the thin layer chromatography (TLC) was identified/visualized by fluorescence quenching or potassium permanganate stains.  $^1\text{H}$  and  $^{13}\text{C}$  NMR spectra were recorded on a Bruker Avance 400 (400 MHz and 100 MHz) or a Bruker Avance 500 (500 MHz and 126 MHz) instrument at 298 K, and are internally referenced to solvent residual signals (note:  $\text{CDCl}_3$  referenced at 7.26 and 77.16 ppm respectively). Data for  $^1\text{H}$  NMR were reported as follows: chemical shift ( $\delta$ , ppm), multiplicity (s = singlet, d = doublet, t = triplet, m = multiplet or unresolved, coupling constant(s) in Hz, integration). Data for  $^{13}\text{C}$  NMR are reported in ppm with the internal chloroform signal at 77.16 ppm as a standard. GPC analysis of crude samples were carried out on a Waters 1515 gel permeation chromatograph (GPC) equipped with a Waters 2414 refractive-index detector, using a Styragel HR 3 THF (7.8  $\times$  300 mm) column and a HR 4 THF(7.8  $\times$  300 mm) column with measurable molecular weights ranging from  $10^2$  to  $10^6$   $\text{g}\cdot\text{mol}^{-1}$ . HPLC grade THF was as eluent at a flow rate of 1.0mL/min at 35  $^\circ\text{C}$  and samples were injected manually. The system was calibrated with Shodex Polystyrene standards. Analysis of isolated polymer molecular weights was performed via gel permeation chromatography (GPC) coupled with multi-angle laser light scattering (MALLS), using an Agilent HPLC and two Shodex GPC KD-806M gel permeation columns (8.0 mm ID $\times$ 300 mm L), a Wyatt Technology TrEX differential refractometer, and a Wyatt Technology DAWN EOS multi-angle light scattering detector, using THF as the eluent at a flow rate of 1.0 mL/min. GC measurements were performed on a GCMS-QP2010SE from SHIMADZU. UV/Vis/NIR spectra were recorded on a perkins Elmer Lambda 900 spectrometer equipped with a PTP-1 Peltier temperature controller and steady-state emission spectra were acquired using

Edinburgh Instruments, FLS920 spectrometer. IR spectra were determined in the range 4000-500  $\text{cm}^{-1}$  on a Nicolet IS50 Fourier transform infrared (FT/IR) spectrometer. Decomposition onset temperatures ( $T_d$ ) and maximum decomposition temperatures ( $T_{\text{max}}$ ) of precipitated and dried polymer samples were measured by thermal gravimetric analysis (TGA) on a TA Instruments Q500 Thermogravimetric Analyzer. Polymer samples were heated from ambient temperatures to 600 °C at a heating rate of 10 °C/min. Values of  $T_d$  (temperature at 5% weight loss) were obtained from wt % vs. temperature (°C) plots, and values of  $T_{\text{max}}$  were obtained from plots of derivative (wt %/°C) vs. temperature (°C). Glass-transition temperature ( $T_g$ ) of precipitated and dried polymer samples were measured using differential scanning calorimetry (DSC) on a TA Instruments Q2000. Heat flow were obtained from the second heating scan after the thermal history was removed. All heating and cooling rates were 10 °C/min. Tensile stress and strain of polymer films were measured to the point of break at room temperature using an extension speed of 20.0 mm/min on a Drick instruments DRK 101D. Measurements were repeated for at least 3 specimens and the values reported are averaged from the measured data.

## 2. General Polymerization Procedures

### *General Polymerization Procedure for catalyst screen*

A 5 mL Shclenk tube equipped with a magnetic stir bar was charged with 0.25 mmol monomers, 1 mol % photocatalyst and 0.5 mL DMF. This system was deoxygenated by five freeze-pump-thaw cycles. The reaction mixture was irradiated with blue light emitting diode (LED,  $\lambda_{\text{max}} = 465 \text{ nm}$ ) reactor at room temperature for 300 min. To analyze the progress of a polymerization at a given time point (60 min and 300 min), one (about 0.02 mL) and two drop of reaction solution were removed in glove box for GPC analysis and  $^1\text{H}$  NMR spectra analysis respectively.

### *General Polymerization Procedure for monomer concentration and photocatalyst content screen*

A 5 mL Schlenk tube equipped with a magnetic stir bar was charged with 0.25-0.1 mmol monomers, 0.01-1 mol % photocatalyst and 0.5 mL DMF. This system was deoxygenated by five freeze-pump-thaw cycles. The reaction mixture was irradiated with blue light emitting diode (LED,  $\lambda_{\text{max}} = 465$  nm) reactor at room temperature for 270 min. To analyze the progress of a polymerization at a given time point, one (about 0.02mL) and two drop of reaction solution were removed in glove box for GPC analysis and  $^1\text{H}$  NMR spectra analysis respectively.

### ***General Polymerization Procedure for Kinetics***

A 5 mL Schlenk tube equipped with a magnetic stir bar was charged with 1.5 mmol monomers, 0.01-1 mol% photocatalyst and 1.0 mL DMF. This system was deoxygenated by five freeze-pump-thaw cycles. The reaction mixture was irradiated with blue light emitting diode (LED,  $\lambda_{\text{max}} = 465$  nm) reactor at room temperature for 72 h. To analyze the progress of a polymerization at a given time point, one (about 0.02mL) and two drop of reaction solution were removed in glove box for GPC analysis and  $^1\text{H}$  NMR spectra analysis respectively.

### ***General Polymerization Procedure for Substrate Scope Study and Solvent Screen***

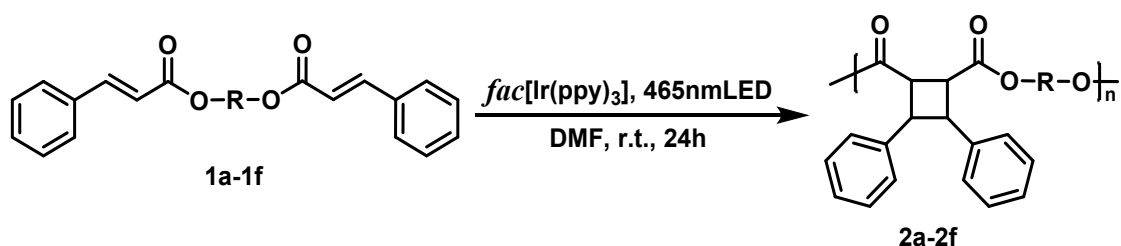

A 5 mL Schlenk tube equipped with a magnetic stir bar was charged with 0.1 or 0.3 mmol monomers, 1 mol % photocatalyst and 0.2 mL DMF or other solvent. This system was deoxygenated by five freeze-pump-thaw cycles. The reaction mixture was irradiated with blue light emitting diode (LED,  $\lambda_{\text{max}} = 465$  nm) reactor at room temperature for 24 h. The reaction mixtures were added directly to 50 mL methanol at ambient temperature to precipitate the polymers (2a-2f).

**Reaction Setup:** Reactions were conducted in an 18 W photo-reactor (Model: H106062, GeAo chemical, Wuhan, China) as shown below. One place/hole with three 3W blue LED beads ( $\lambda_{\text{max}} = 465 \text{ nm}$ ) on both side, and the distance between the Schlenk tube and LED beads is ca. 2 cm. The light intensity is  $66.6 \text{ mW/cm}^2$ .

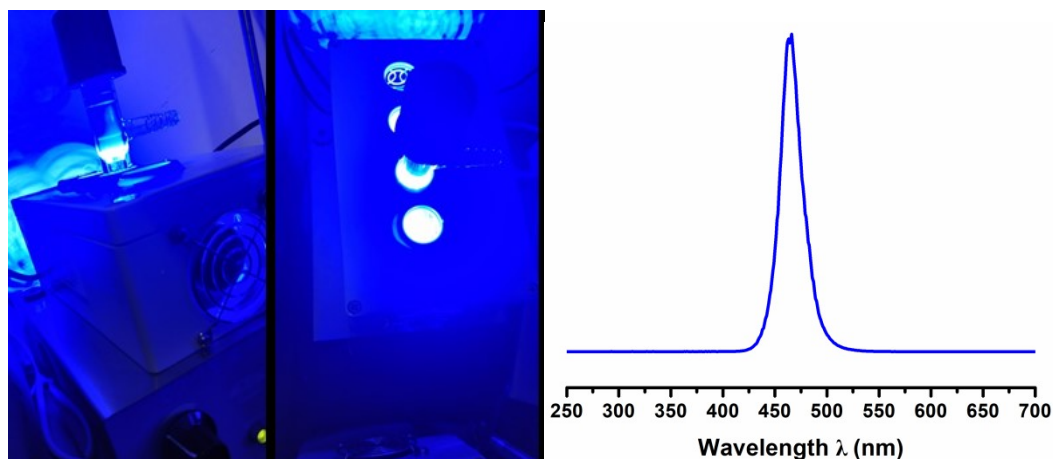

### 3. Preparation of Dicinnamates Monomers

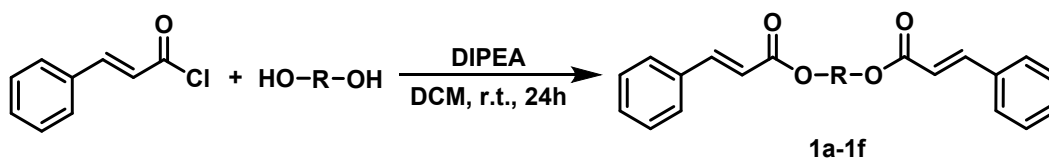

#### *General procedure for the preparation monomer 1a-1f*

Excessive cinnamoyl chloride (3.65 g, 22 mmol) were dissolved in 10 mL  $\text{CH}_2\text{Cl}_2$ , and then added dropwise to a solution of diol (10 mmol) and *N,N*-diisopropylethylamine (DIPEA) (2.84 g, 22 mmol) in 15 mL  $\text{CH}_2\text{Cl}_2$ . The reaction mixture was continuously stirred at room temperature for 24h. The resulting solution was washed with dilute hydrochloric acid and water, dried with anhydrous magnesium sulfate. The white crystals was obtained by column chromatography on silica gel and following recrystallization from ethanol.

**Ethylene dicinnamate (1a)** was prepared following the general procedure for the preparation of monomers, and the used diol is ethylene glycol (0.62g, 10mmol).

Purification via flash chromatography (silica gel and eluting with dichloromethane/petroleum ether = 1:3→2:1;  $R_f$  = 0.25 at dichloromethane/petroleum ether = 2:1) and recrystallization from ethanol yielded **1a** as a white crystalline solid (yield = 72%):  $^1\text{H}$  NMR (400 MHz,  $\text{CDCl}_3$ )  $\delta$  7.74 (d,  $J$  = 16.0 Hz, 2H), 7.55-7.52 (m, 4H), 7.40-7.38 (m, 6H), 6.49 (d,  $J$  = 16.0 Hz, 2H), 4.50 (s, 4H);  $^{13}\text{C}$  NMR (100 MHz,  $\text{CDCl}_3$ )  $\delta$  166.86, 145.61, 134.44, 130.57, 129.05, 128.31, 117.70, 62.53;

**Isopropylene dicinnamate (1b)** was prepared following the general procedure for the preparation of monomers, and the used diol is isopropylene glycol (0.76g, 10mmol). Purification via flash chromatography (silica gel and eluting with dichloromethane/petroleum ether = 1:3→2:1;  $R_f$  = 0.32 at dichloromethane/petroleum ether = 2:1) and recrystallization from ethanol yielded **1b** as a white solid (yield = 68%):  $^1\text{H}$  NMR (400 MHz,  $\text{CDCl}_3$ )  $\delta$  7.71 (d,  $J$  = 16.0Hz, 2H), 7.54-7.51 (m, 4H), 7.39-7.37 (m, 6H), 6.46 (d,  $J$  = 16.0 Hz, 2H), 5.38-5.35 (m, 1H), 4.38-4.30 (m, 2H), 1.39 (d,  $J$  = 6.3Hz, 3H);  $^{13}\text{C}$  NMR (100 MHz,  $\text{CDCl}_3$ )  $\delta$  166.79, 166.46, 145.53, 145.27, 134.52, 134.45, 130.53, 130.47, 129.02, 128.30, 128.27, 118.24, 117.73, 68.64, 66.40, 16.82;

**Pentylene dicinnamate (1c)** was prepared following the general procedure for the preparation of monomers, and the used diol pentylene glycol (1.04g, 10mmol). Purification via flash chromatography (silica gel and eluting with dichloromethane/petroleum ether = 1:3→2:1;  $R_f$  = 0.28 at dichloromethane/petroleum ether = 2:1) and recrystallization from ethanol yielded **1c** as a white solid (yield = 71%):  $^1\text{H}$  NMR (400 MHz,  $\text{CDCl}_3$ )  $\delta$  7.69 (d,  $J$  = 16.0 Hz, 2H), 7.53-7.51 (m, 4H), 7.38-7.36 (m, 6H), 6.44 (d,  $J$  = 16.0 Hz, 2H), 4.24 (t,  $J$  = 6.3Hz, 4H), 1.82-1.75 (m, 4H), 1.57-1.51(m, 2H);  $^{13}\text{C}$  NMR (100 MHz,  $\text{CDCl}_3$ )  $\delta$  167.17, 144.87, 134.58, 130.39, 129.02, 128.21, 118.30, 64.48, 28.56, 22.76;

**Hexylene dicinnamate (1d)** was prepared following the general procedure for the preparation of monomers, and the used diol is hexylene glycol (1.18g, 10mmol). Purification via flash chromatography (silica gel and eluting with dicholomethane/petroleum ether = 1:3→2:1;  $R_f$  = 0.3 at dicholomethane/petroleum ether = 2:1) and recrystallization from ethanol yielded 1f as a white crystalline solid (73%):  $^1\text{H}$  NMR (400 MHz,  $\text{CDCl}_3$ )  $\delta$  7.68 (d,  $J$  = 16.0 Hz, 2H), 7.53-7.50 (m, 4H), 7.38-7.36 (m, 6H), 6.44 (d,  $J$  = 16.0 Hz, 2H), 4.22 (t,  $J$  = 6.4Hz, 4H), 1.77-1.71 (m, 4H), 1.50-1.46 (m, 4H);  $^{13}\text{C}$  NMR (100 MHz,  $\text{CDCl}_3$ )  $\delta$  167.10, 144.72, 134.53, 130.30, 128.94, 128.14, 118.30, 64.55, 28.74, 25.79;

**1,4-Butendiol dicinnamate (1e)** was prepared following the general procedure for the preparation of monomers, and the used diol is 1,4-butendiol (0.88g, 10mmol). Purification via flash chromatography (silica gel and eluting with dicholomethane/petroleum ether = 1:3→2:1;  $R_f$  = 0.29 at dicholomethane/petroleum ether = 2:1) and recrystallization from ethanol yielded 1g as a white solid (yield = 66%):  $^1\text{H}$  NMR (400 MHz,  $\text{CDCl}_3$ )  $\delta$  7.72 (d,  $J$  = 16.0 Hz, 2H), 7.54-7.51 (m, 4H), 7.39-7.37 (m, 6H), 6.45 (d,  $J$  = 16.0 Hz, 2H), 6.00-5.85 (m, 2H), 4.91-4.76 (m, 4H);  $^{13}\text{C}$  NMR (100 MHz,  $\text{CDCl}_3$ )  $\delta$  166.77, 145.39, 134.48, 130.51, 129.04, 128.26, 117.85, 60.29;

**1,4-Benzenedimethanol dicinnamate (1f)** was prepared following the general procedure for the preparation of monomers, and the used diol is 1,4-benzenedimethanol (1.38g, 10mmol). Purification via flash chromatography (silica gel and eluting with dicholomethane/petroleum ether = 1:3→2:1;  $R_f$  = 0.34 at dicholomethane/petroleum ether = 2:1) and recrystallization from ethanol yielded 1j as a white crystalline solid (yield = 73%):  $^1\text{H}$  NMR (400 MHz,  $\text{CDCl}_3$ )  $\delta$  7.73 (d,  $J$  = 16.0 Hz, 2H), 7.54-7.51 (m, 4H), 7.44 (s, 4H), 7.40-7.37 (m, 6H), 6.49 (d,  $J$  = 16.0 Hz, 2H), 5.26 (s, 4H);  $^{13}\text{C}$  NMR (100 MHz,  $\text{CDCl}_3$ )  $\delta$  166.87, 145.43, 136.32, 134.48, 130.52, 129.05, 128.66, 128.26, 117.94, 66.13;



## 4. General Dimerization Procedures of Ethyl Cinnamates

A 5 mL Shlenk tube equipped with a magnetic stir bar was charged with 0.25 mmol (44.5 mg) ethyl cinnamates, 1 mol % (5.0 mg) photocatalyst *fac*-[Ir(ppy)<sub>3</sub>] and 0.5 mL DMF. This system was deoxygenated by five freeze-pump-thaw cycles. The reaction mixture was irradiated with blue light emitting diode (LED,  $\lambda_{\text{max}} = 465 \text{ nm}$ ) reactor at room temperature for 24 h. Then the reaction mixture was saturated with brine (5 mL) and extracted with ethyl acetate (3 x 10 mL). After drying the combined organic layers on Na<sub>2</sub>SO<sub>4</sub>, the resulting solution was concentrated in vacuo. Purification by a short silica-gel column using hexanes and ethyl acetate as eluents afforded cycloaddition product.

## 5. General Calculating Method for Monomer Conversion

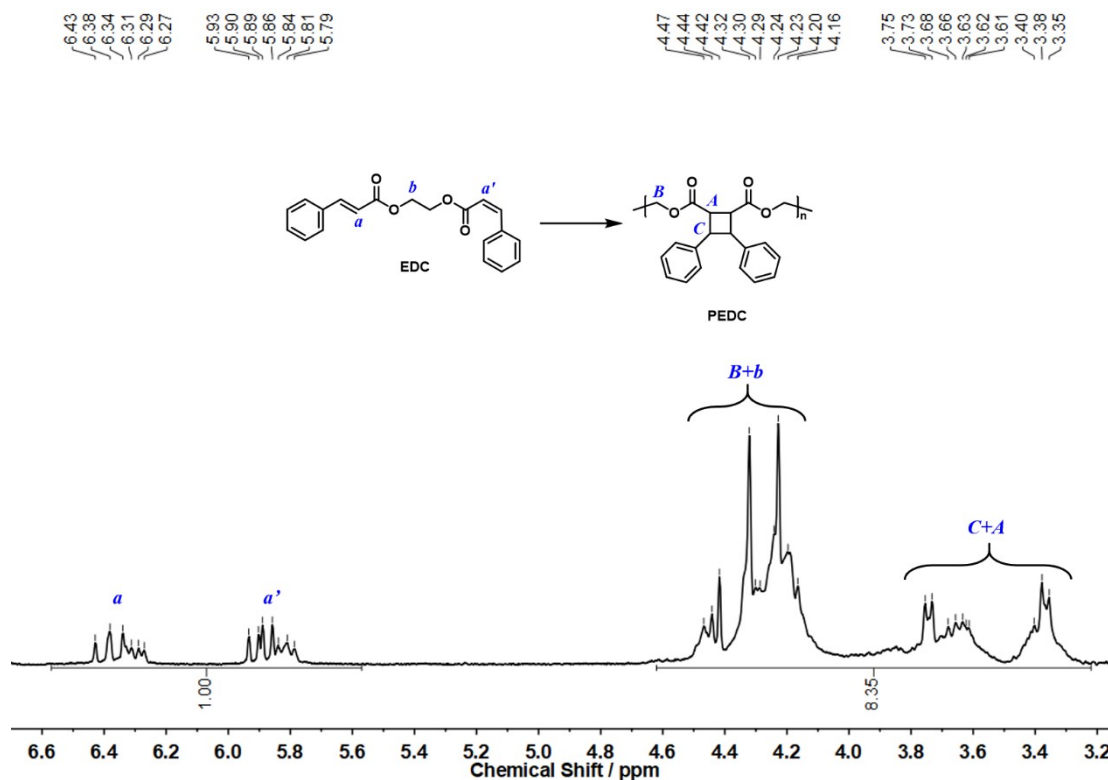

Figure S1  $^1\text{H}$  NMR spectra of EDC polymerization catalyzed by 1% *fac*[Ir(ppy) $_3$ ]  
(0.5M, 300 min)

$C+A$

$$\begin{aligned} &= \frac{(C + A) + (B + b) - b}{2} = \frac{(C + A) + (B + b) - 2(a + a')}{2} = \frac{8.35 - 2 * 1}{2} = 3.175 \\ \text{Conv.} &= \frac{C + A}{C + A + 2(a + a')} = \frac{3.175}{3.175 + 2} = 61\% \end{aligned}$$

The letters represent the integration in the  $^1\text{H}$  NMR spectrum. The conversion percentage mentioned in this paper all calculated from this method.

## 6. Monomer Concentration and Catalyst Dosage Screen

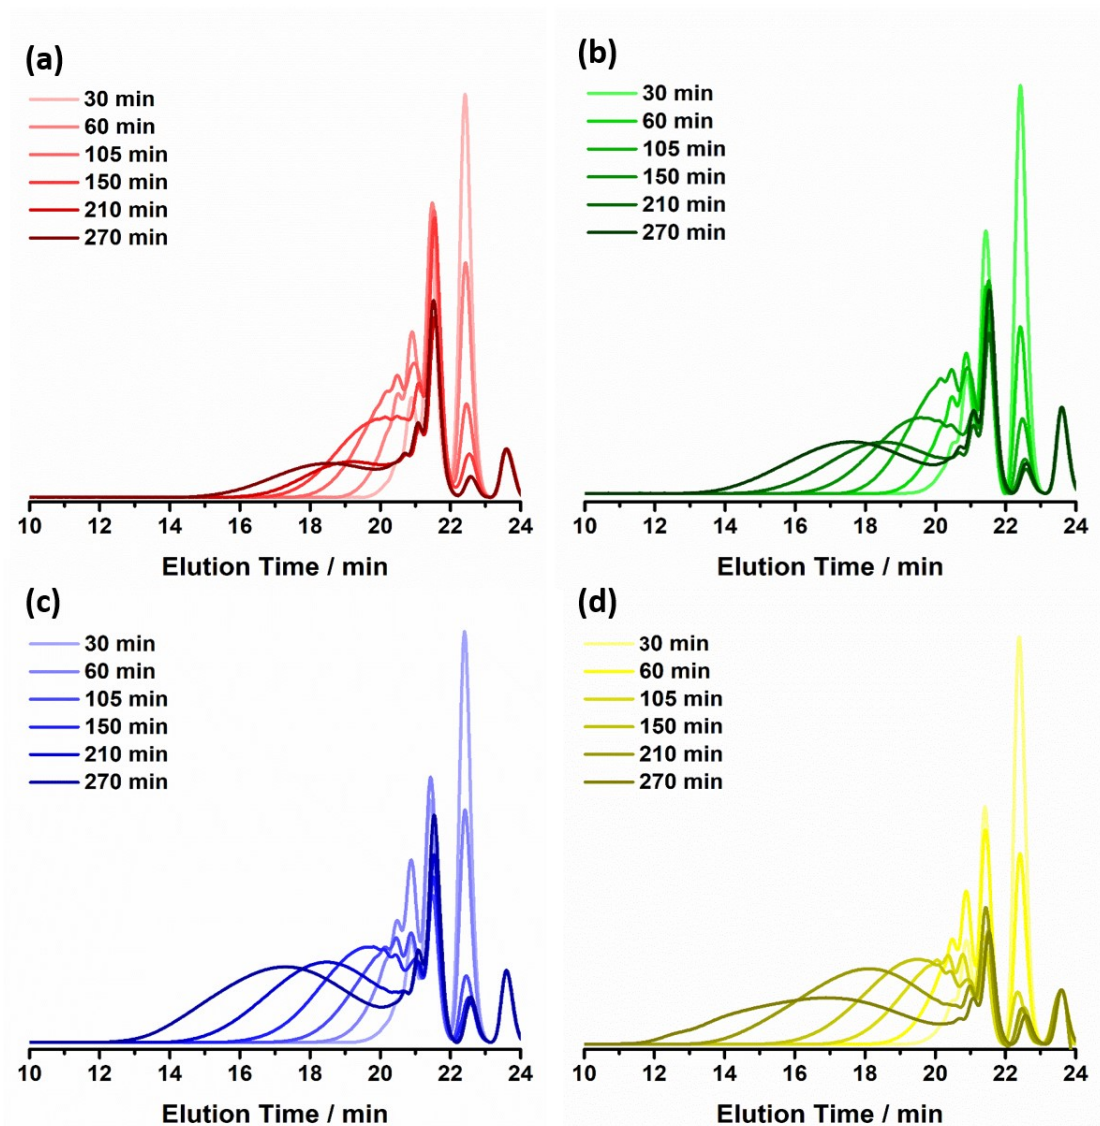

Figure S2 Overlaying GPC traces of crude aliquots that were taken at different time intervals (from 30-270 min) in different monomer concentration, (a) 0.5M, (b) 1.0M, (c) 1.5M, (d) 2.0M.

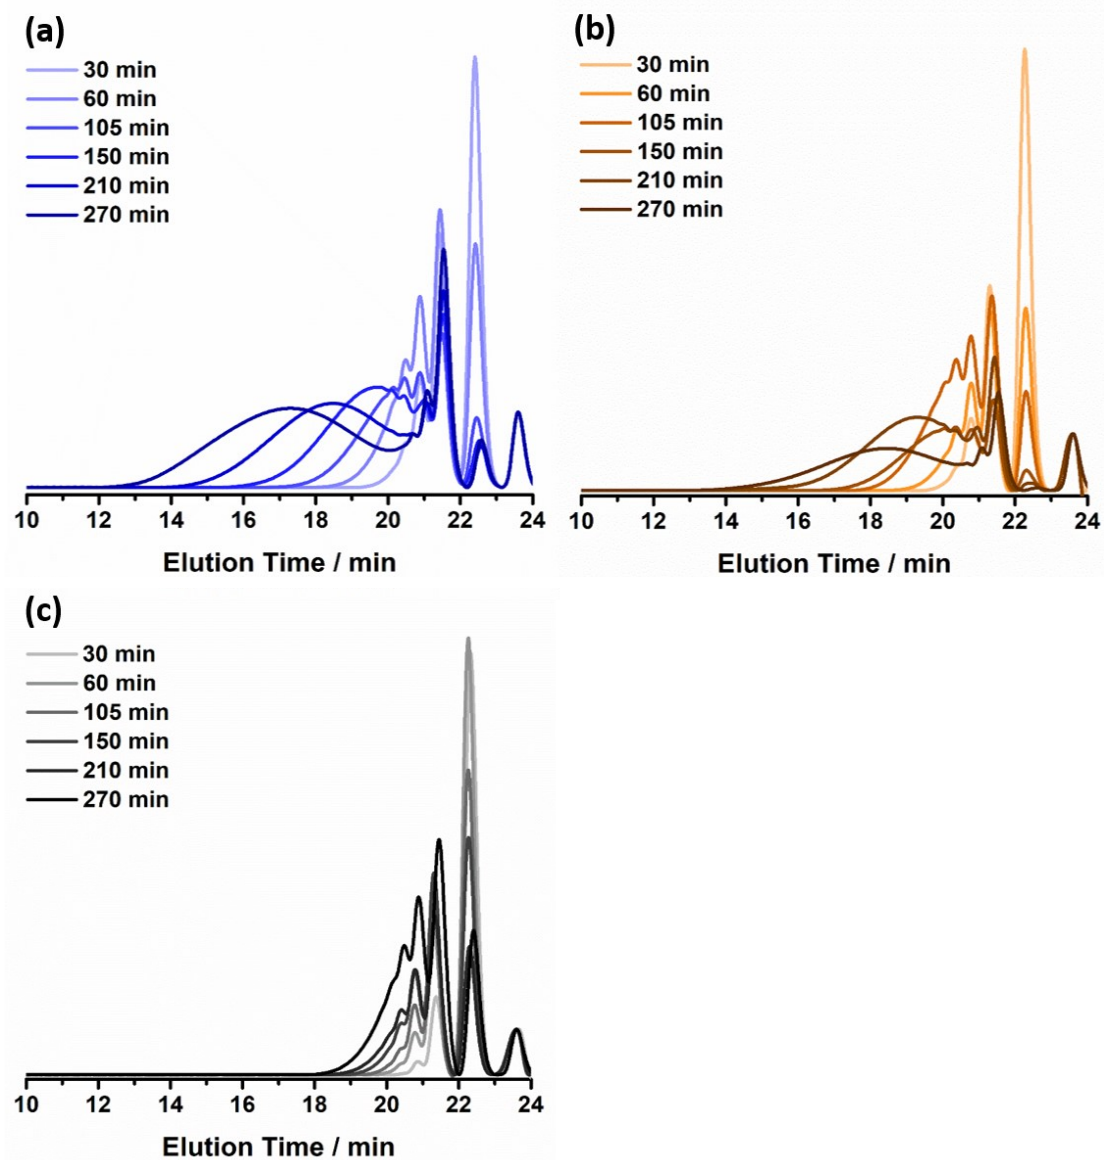

Figure S3 Overlaying GPC traces of crude aliquots that were taken at different time intervals (from 30-270 min) in different catalyst dosage, (a) 1 mol %, (b) 0.1 mol %, (c) 0.01 mol %.

## 7. Polymerization Solvent Screen

| Solvent     | Yield(%) <sup>a</sup> | $M_w$ (kDa) <sup>b</sup> | $M_n$ (kDa) <sup>b</sup> | $M_w/M_n$ <sup>b</sup> |
|-------------|-----------------------|--------------------------|--------------------------|------------------------|
| DMF         | 71.6                  | 31.8                     | 9.6                      | 3.29                   |
| DMA         | 55.3                  | 23.9                     | 7.1                      | 3.38                   |
| Toluene     | 66.7                  | 18.9                     | 6.9                      | 2.72                   |
| DCM         | 43.7                  | 28.5                     | 8.9                      | 3.20                   |
| THF         | 65.8                  | 25.7                     | 8.1                      | 3.17                   |
| 1,4-Dioxane | 65.0                  | 21.8                     | 7.8                      | 2.79                   |
| DMSO        | 56.0                  | 24.6                     | 7.4                      | 3.35                   |

[a] The yield of polymer is isolated yield. [b] The GPC data is determined through calibration column method (standard PS).

Table S1 Polymerization solvent screen

## 8. Dependence of Polymerization Result on Time

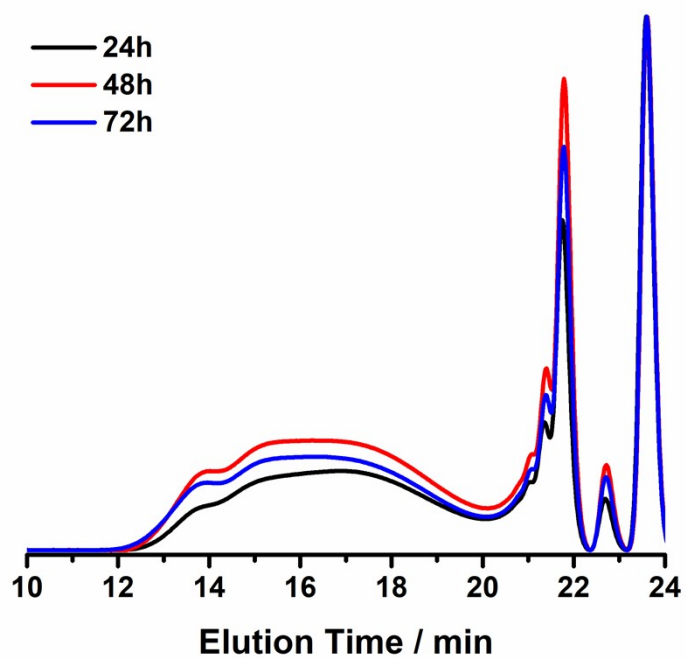

Figure S4 Overlaying GPC traces of prolonging polymerization time (crude sample)

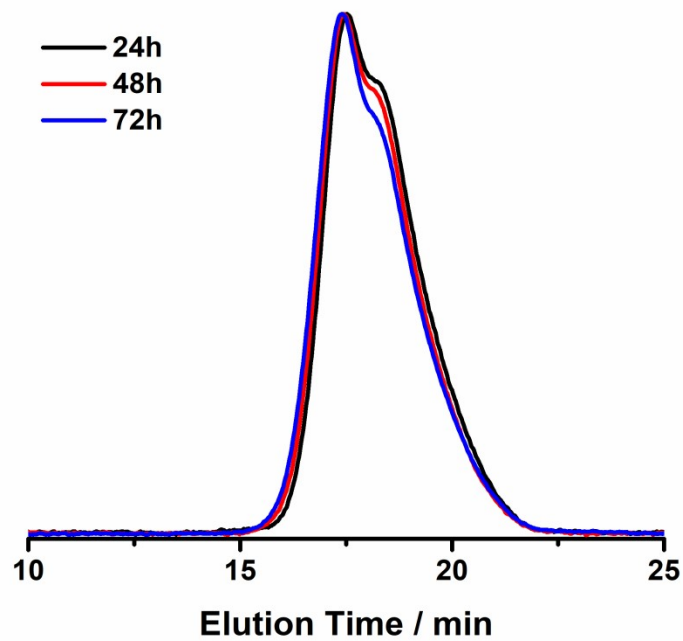

Figure S5 Overlaying MALS signal of prolonging polymerization time (isolated polymer, detector scattering angle:  $90^\circ$  )

## 9. GC-MS Spectra of Dimerization of Ethyl Cinnamates

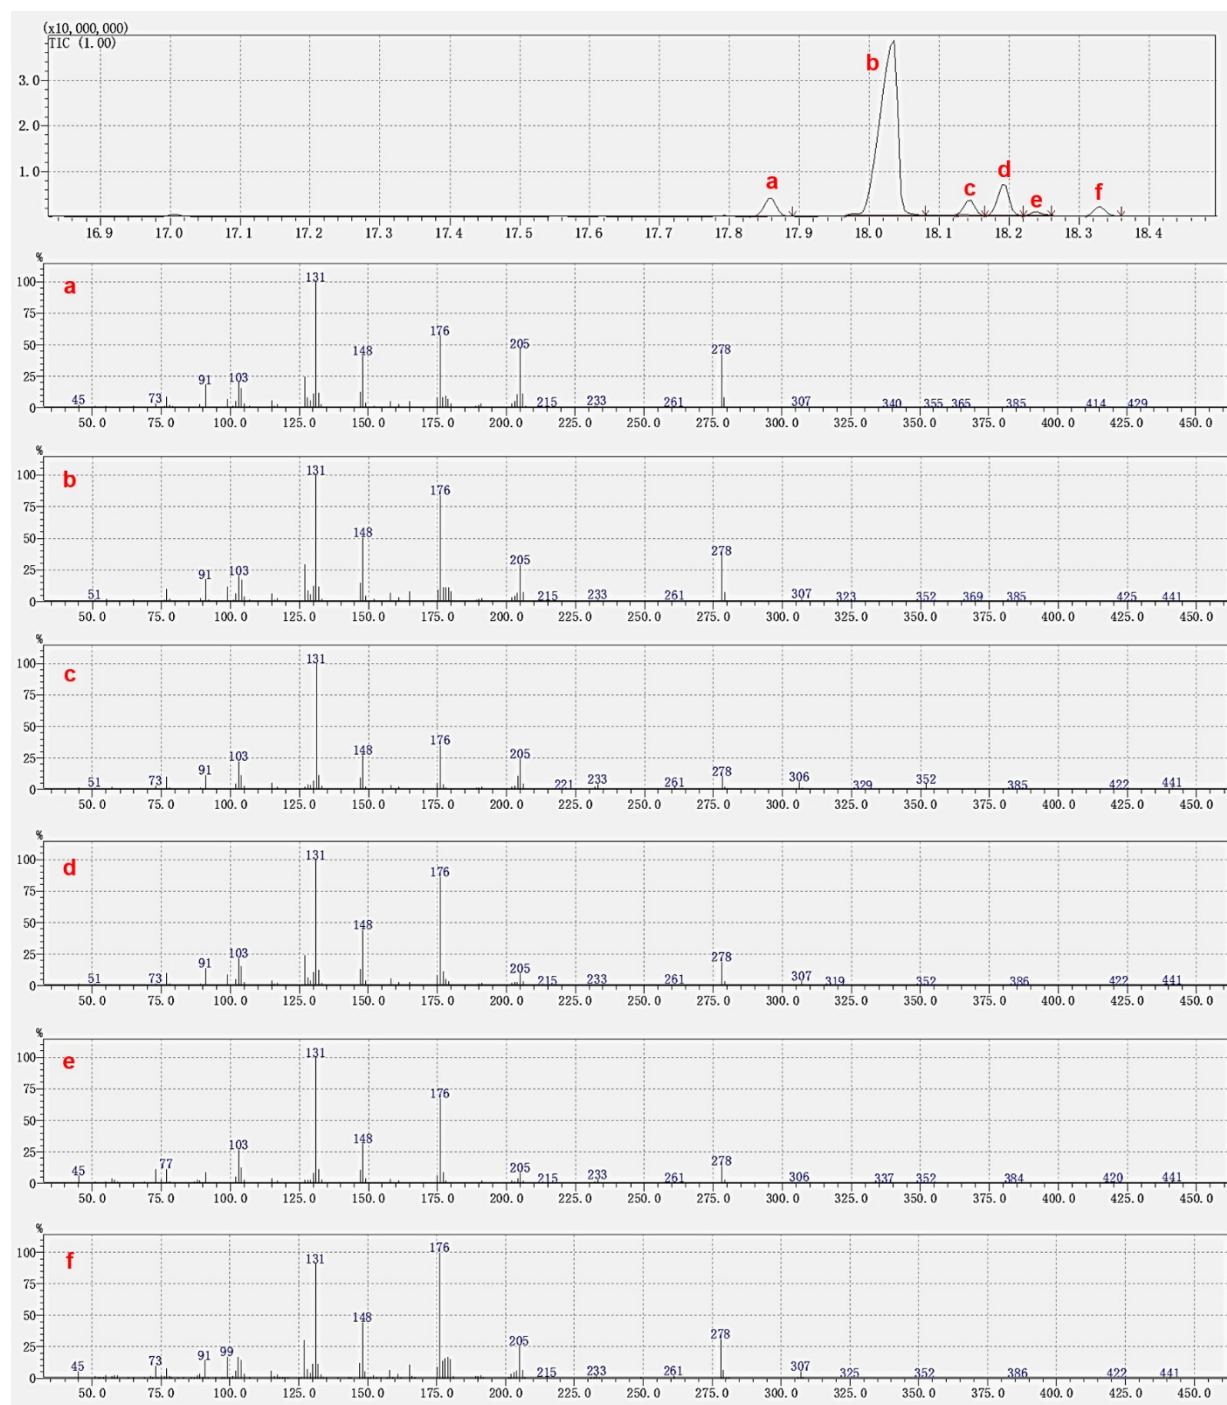

Figure S6 GC-MS spectra of dimerization of ethyl cinnamates and the fragment peak of six cyclobutane isomer



| Peak | Retention time (min) | Peak Area | Content (%) |
|------|----------------------|-----------|-------------|
| a    | 17.86                | 4912802   | 5.7         |
| b    | 18.03                | 67440154  | 77.8        |
| c    | 18.14                | 3392204   | 3.9         |
| d    | 18.19                | 7788478   | 9.0         |
| e    | 18.24                | 901912    | 1.0         |
| f    | 18.33                | 2286275   | 2.6         |

Table S2 GC-MS spectra peak data

## 10. GPC Analysis Details

GPC was used to determine number average molecular weight ( $M_n$ ), weight average molecular weight ( $M_w$ ), and dispersity ( $M_w / M_n$ ). Some polymer (solvent screen) was calibrated using narrow molecular weight polystyrene standards and isolated polymer was determined using multi-angle light scattering (Wyatt DAWN EOS) detector. Mobile phase was HPLC grade THF. MALS analysis reports are provided for the key polymer samples.

### Multi-angle Light Scattering (MALS) GPC

The differential index of refraction (dn/dc) was determined using batch method by plotting the refractive index of the polymer solution versus varying solution concentrations. The sample PEDC (2a) was dissolved in HPLC grade THF, for dn/dc determination and subsequent MALS analysis was HPLC grade THF.<sup>1</sup>

| Entry | Concentration (mg/mL) | Differential Refractive Index ( $10^{-4}$ ) |
|-------|-----------------------|---------------------------------------------|
| 1     | 0.411                 | 0.576                                       |
| 2     | 1.028                 | 1.45                                        |
| 3     | 2.056                 | 3.56                                        |
| 4     | 3.084                 | 5.55                                        |
| 5     | 4.111                 | 6.83                                        |
| 6     | 6.167                 | 10.7                                        |

Table S3 dn/dc calculation data of polymer for THF

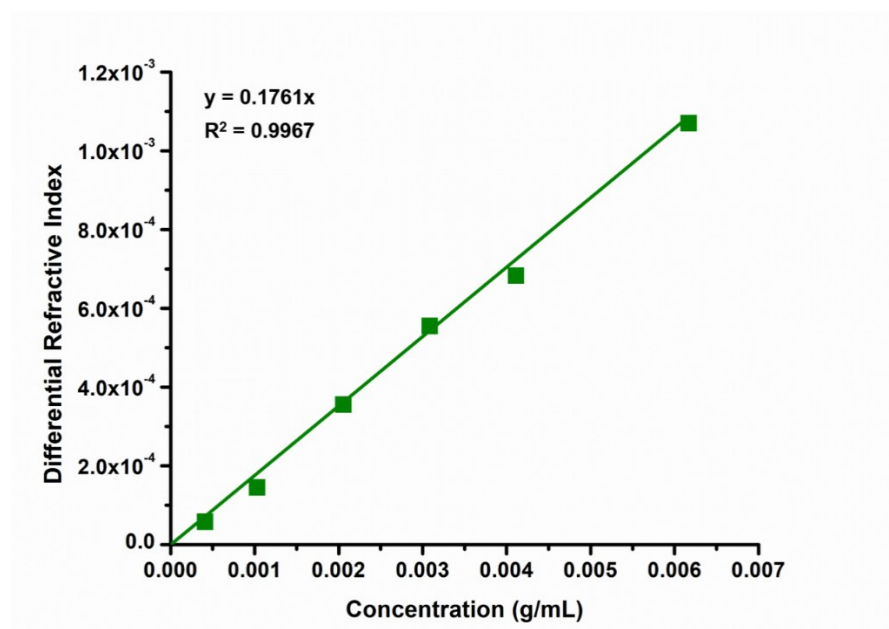

Figure S7 Polymer Concentration vs Differential Refractive Index plot to calculate dn/dc

| <b>Polymer</b> | <b>Yield(%)<sup>a</sup></b> | <b><math>M_w</math> (kDa)</b> | <b><math>M_n</math> (kDa)</b> | <b><math>M_w/M_n</math></b> |
|----------------|-----------------------------|-------------------------------|-------------------------------|-----------------------------|
| PEDC (2a)      | 71.6                        | 38.6                          | 12.1                          | 3.20                        |
| PIPDC (2b)     | 68.8                        | 61.3                          | 19.4                          | 3.16                        |
| PPDC (2c)      | 50.3                        | 14.7                          | 6.7                           | 2.19                        |
| PHDC (2d)      | 46.7                        | 18.6                          | 7.1                           | 2.61                        |
| PBDC (2e)      | 67.9                        | 60.5                          | 22.5                          | 2.69                        |
| PBMDC (2f)     | 58.2                        | 25.3                          | 13.8                          | 1.84                        |

[a] The yield of polymer is isolated yield.

Table S4 The information of polymers from different monomers

## GPC-MALS Analysis Reports

### Polymer PEDC (2a)

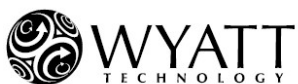

Sample: E004

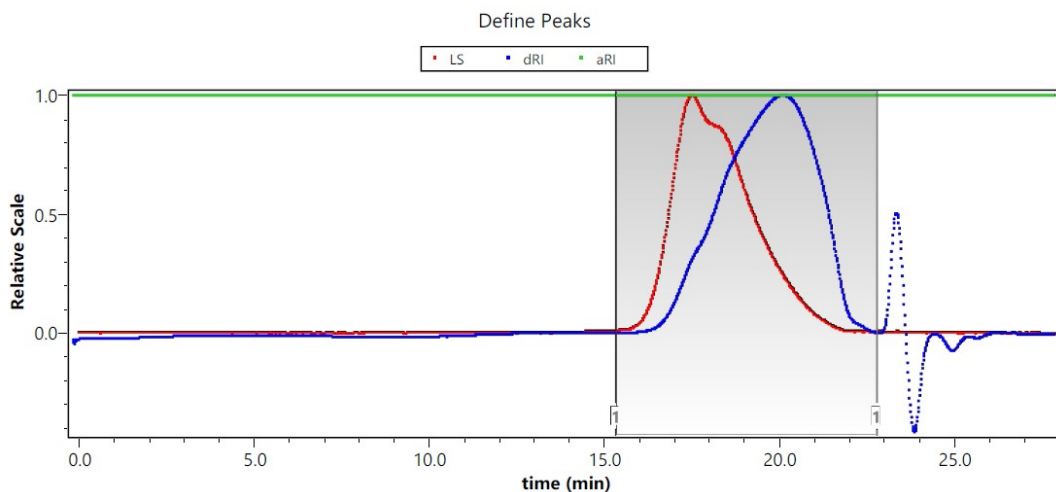

### Configuration

**Concentration Source:** RI  
**Flow Rate:** 1.000 mL/min

**Light Scattering Instrument:** DAWN EOS  
**Physical Instrument Name:** DAWN EOS on COM3  
**Wavelength:** 690.0 nm  
**Calibration Constant:**  $9.3437 \times 10^{-6}$  1/(V cm)

| Detector | Refractive Index | Corrected Scattering Angle | Gain | Normalization Coefficient |
|----------|------------------|----------------------------|------|---------------------------|
| 1        | n/a              |                            | 101  | 1.000                     |
| 2        | 16.9°            |                            | 101  | 1.487                     |
| 3        | 23.2°            |                            | 101  | 1.162                     |
| 4        | 31.4°            |                            | 101  | 1.166                     |
| 5        | 38.8°            |                            | 101  | 1.349                     |
| 6        | 45.8°            |                            | 101  | 0.695                     |
| 7        | 53.8°            |                            | 101  | 0.812                     |
| 8        | 61.6°            |                            | 101  | 0.897                     |
| 9        | 70.4°            |                            | 101  | 1.119                     |
| 10       | 80.2°            |                            | 101  | 1.100                     |
| 11       | 90.0°            |                            | 101  | 1.000                     |
| 12       | 99.8°            |                            | 101  | 0.968                     |
| 13       | 109.6°           |                            | 101  | 0.933                     |
| 14       | 119.5°           |                            | 101  | 0.822                     |
| 15       | 129.6°           |                            | 101  | 0.868                     |
| 16       | 138.8°           |                            | 101  | 65.771                    |
| 17       | 147.4°           |                            | 101  | 1.383                     |
| 18       | 155.4°           |                            | 101  | 1.041                     |

**RI Instrument:** rEX  
**Temperature:** 35.0 °C  
**Physical Instrument Name:** Optilab T-rEX  
**Calibration Constant:**  $3.4484 \times 10^{-5}$  RIU/pixel

**Solvent:** thf  
**Temperature Correction Enabled:** yes  
**Refractive Index:** 1.401

## Processing

### Peak settings:

|                             |                 |
|-----------------------------|-----------------|
| Peak Name                   | Peak 1          |
| Peak Limits (min)           | 15.350 - 22.816 |
| Light Scattering Model      | Zimm            |
| Fit Degree                  | 1               |
| dn/dc (mL/g)                | 0.1761          |
| A2 (mol mL/g <sup>2</sup> ) | 0.000           |
| UV Ext. Coef. (mL/(mg cm))  | 0.000           |

## Results

### Peak Results

|                                   | Peak 1                                |
|-----------------------------------|---------------------------------------|
| <b>Masses</b>                     |                                       |
| Injected Mass ( $\mu\text{g}$ )   | 0.00                                  |
| Calculated Mass ( $\mu\text{g}$ ) | 314.00                                |
| Mass Recovery (%)                 | n/a                                   |
| Mass Fraction (%)                 | 100.0                                 |
| <b>Molar mass moments (g/mol)</b> |                                       |
| Mn                                | $1.382 \times 10^4$ ( $\pm 3.562\%$ ) |
| Mp                                | $1.472 \times 10^4$ ( $\pm 0.729\%$ ) |
| Mv                                | n/a                                   |
| Mw                                | $4.726 \times 10^4$ ( $\pm 0.551\%$ ) |
| Mz                                | $1.428 \times 10^5$ ( $\pm 1.127\%$ ) |
| <b>Polydispersity</b>             |                                       |
| Mw/Mn                             | 3.419 ( $\pm 3.605\%$ )               |
| Mz/Mn                             | 10.328 ( $\pm 3.736\%$ )              |
| <b>rms radius moments (nm)</b>    |                                       |
| rn                                | n/a                                   |
| rw                                | 6.9 ( $\pm 148.8\%$ )                 |
| rz                                | 10.7 ( $\pm 21.3\%$ )                 |

## Polymer PEDC (2a, PS standard)

Sample: E004

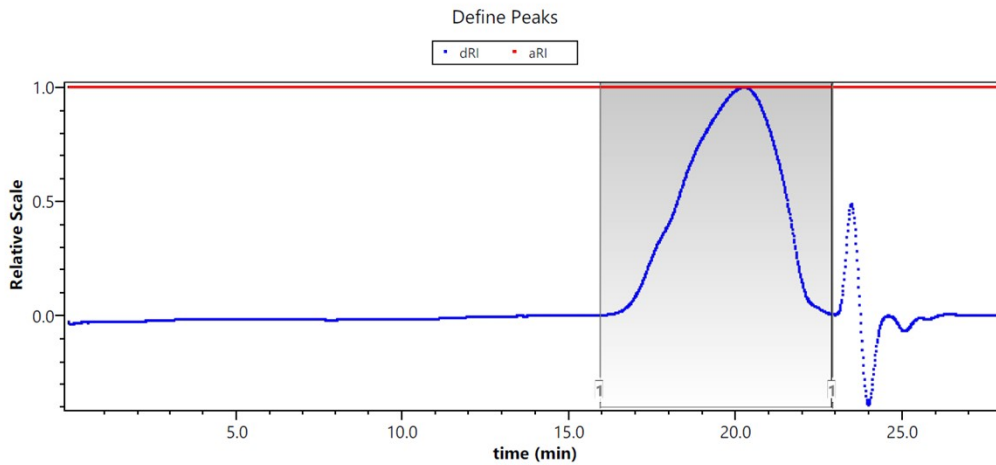
**Configuration**

 Concentration Source: RI  
 Flow Rate: 1.000 mL/min

RI Instrument: rEX

 Band Broadening Correction: Yes (Instrumental: 1.000  $\mu$ L, Mixing: 50.000  $\mu$ L)  
 Wavelength: 658.0 nm

Column: column calibration file-PS-1019

Flow Marker: 24.029 mL

Mark-Houwink-Sakurada a: 0.000

Mark-Houwink-Sakurada K: 0.000 mL/g

Conventional Calibration Function Fit Standard Error: 0.0467658

Universal Calibration Function Fit Standard Error: 0

Calibration Technique: Conventional

 Conventional Calibration Function:  $\log(\text{Molar Mass}) = 33.6631 - 3.99736 v + 0.20139 v^2 - 0.00376164 v^3$ 

Solvent: THF

Refractive Index: 1.397

**Processing**

Peak settings:

| Peak | Peak Name | dn/dc  | Viscometry Model | Huggins Equation Parameter | Kraemers Equation Parameter |
|------|-----------|--------|------------------|----------------------------|-----------------------------|
| 1    | Peak 1    | 0.1850 | Huggins          | 0                          | 0                           |

**Results**

Peak Results

Peak 1

Molar mass moments (g/mol)

|        |                     |                    |
|--------|---------------------|--------------------|
| Mn     | $8.236 \times 10^3$ | ( $\pm 11.369\%$ ) |
| Mp     | $1.119 \times 10^4$ | ( $\pm 11.369\%$ ) |
| Mw     | $3.594 \times 10^4$ | ( $\pm 11.369\%$ ) |
| Mz     | $1.089 \times 10^5$ | ( $\pm 25.423\%$ ) |
| M(avg) | $7.221 \times 10^2$ | ( $\pm 1.174\%$ )  |

Polydispersity

|       |        |                    |
|-------|--------|--------------------|
| Mw/Mn | 4.364  | ( $\pm 16.079\%$ ) |
| Mz/Mn | 13.226 | ( $\pm 27.849\%$ ) |

**Polymer PIPDC (2b)**

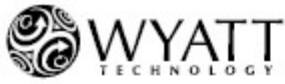

Sample: F146

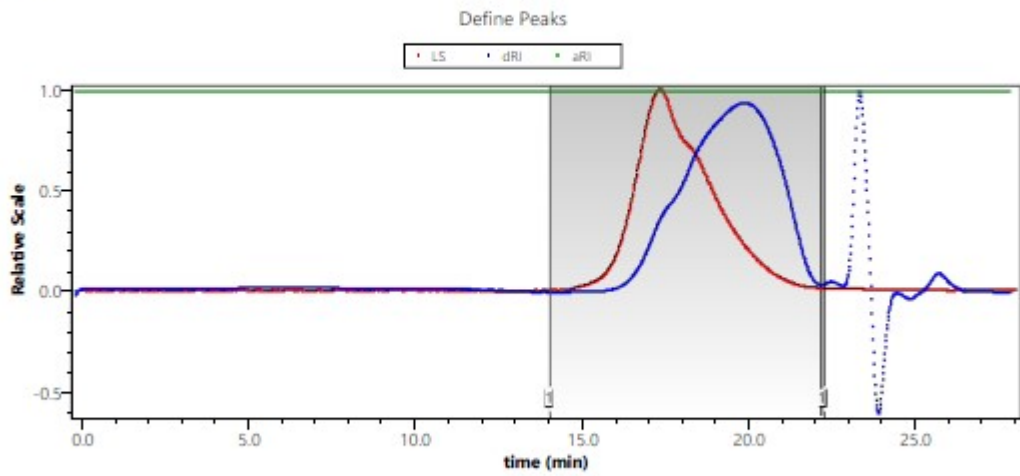

**Configuration**

Concentration Source: RI  
 Flow Rate: 1.000 mL/min

Light Scattering Instrument: DAWN EOS  
 Physical Instrument Name: DAWN EOS on COM3  
 Wavelength: 690.0 nm  
 Calibration Constant:  $9.3437 \times 10^{-6}$  1/(V cm)

| Detector | Refractive Index | Corrected Scattering Angle | Gain | Normalization Coefficient |
|----------|------------------|----------------------------|------|---------------------------|
| 1        | n/a              |                            | 101  | 1.000                     |
| 2        | 16.9°            |                            | 101  | 1.487                     |
| 3        | 23.2°            |                            | 101  | 1.162                     |
| 4        | 31.4°            |                            | 101  | 1.166                     |
| 5        | 38.8°            |                            | 101  | 1.349                     |
| 6        | 45.8°            |                            | 101  | 0.695                     |
| 7        | 53.8°            |                            | 101  | 0.812                     |
| 8        | 61.6°            |                            | 101  | 0.897                     |
| 9        | 70.4°            |                            | 101  | 1.119                     |
| 10       | 80.2°            |                            | 101  | 1.100                     |
| 11       | 90.0°            |                            | 101  | 1.000                     |
| 12       | 99.8°            |                            | 101  | 0.968                     |
| 13       | 109.6°           |                            | 101  | 0.933                     |
| 14       | 119.5°           |                            | 101  | 0.822                     |
| 15       | 129.6°           |                            | 101  | 0.868                     |
| 16       | 138.8°           |                            | 101  | 65.771                    |
| 17       | 147.4°           |                            | 101  | 1.383                     |
| 18       | 155.4°           |                            | 101  | 1.041                     |

RI Instrument: rEX  
 Temperature: 35.0 °C  
 Physical Instrument Name: Optilab T-rEX  
 Calibration Constant:  $3.4484 \times 10^{-5}$  RIU/pixel

Solvent: thf  
 Temperature Correction Enabled: yes  
 Refractive Index: 1.401

## Processing

### Peak settings:

|                             |                 |
|-----------------------------|-----------------|
| Peak Name                   | Peak 1          |
| Peak Limits (min)           | 14.027 - 22.226 |
| Light Scattering Model      | Zimm            |
| Fit Degree                  | 1               |
| dn/dc (mL/g)                | 0.1761          |
| A2 (mol mL/g <sup>2</sup> ) | 0.000           |
| UV Ext. Coef. (mL/(mg cm))  | 0.000           |

## Results

### Peak Results

|                                   | Peak 1                          |
|-----------------------------------|---------------------------------|
| <b>Masses</b>                     |                                 |
| Injected Mass (µg)                | 300.00                          |
| Calculated Mass (µg)              | 256.35                          |
| Mass Recovery (%)                 | 85.5                            |
| Mass Fraction (%)                 | 100.0                           |
| <b>Molar mass moments (g/mol)</b> |                                 |
| Mn                                | 1.940×10 <sup>4</sup> (±1.321%) |
| Mp                                | 1.843×10 <sup>4</sup> (±0.450%) |
| Mv                                | n/a                             |
| Mw                                | 6.132×10 <sup>4</sup> (±0.300%) |
| Mz                                | 2.147×10 <sup>5</sup> (±0.883%) |
| <b>Polydispersity</b>             |                                 |
| Mw/Mn                             | 3.161 (±1.355%)                 |
| Mz/Mn                             | 11.069 (±1.589%)                |
| <b>rms radius moments (nm)</b>    |                                 |
| rn                                | 19.7 (±16.9%)                   |
| rw                                | 15.7 (±14.7%)                   |
| rz                                | 13.9 (±7.5%)                    |

Polymer PPDC (2c)



Sample: F153

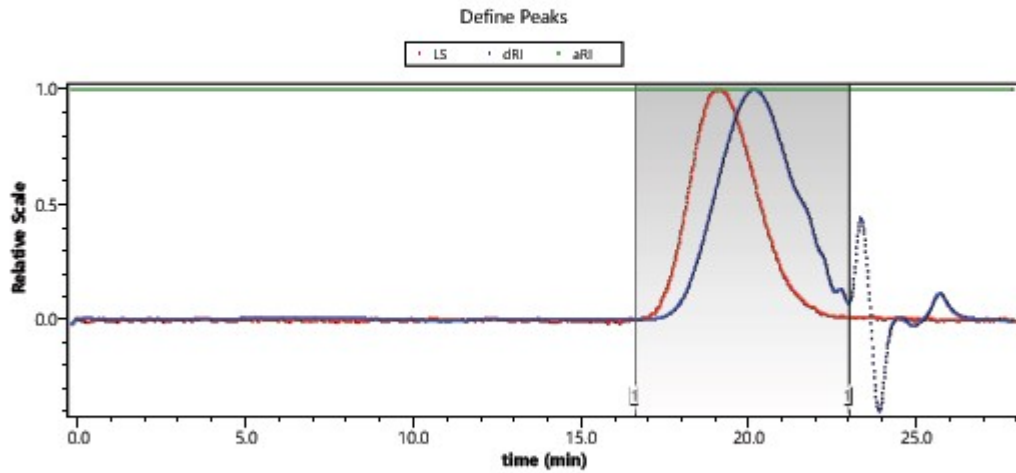

#### Configuration

**Concentration Source:** RI

**Flow Rate:** 1.000 mL/min

**Light Scattering Instrument:** DAWN EOS

**Physical Instrument Name:** DAWN EOS on COM3

**Wavelength:** 690.0 nm

**Calibration Constant:**  $9.3437 \times 10^{-6}$  1/(V cm)

| Detector | Refractive Index | Corrected Scattering Angle | Gain | Normalization Coefficient |
|----------|------------------|----------------------------|------|---------------------------|
| 1        | n/a              |                            | 101  | 1.000                     |
| 2        | 16.9°            |                            | 101  | 1.487                     |
| 3        | 23.2°            |                            | 101  | 1.162                     |
| 4        | 31.4°            |                            | 101  | 1.166                     |
| 5        | 38.8°            |                            | 101  | 1.349                     |
| 6        | 45.8°            |                            | 101  | 0.695                     |
| 7        | 53.8°            |                            | 101  | 0.812                     |
| 8        | 61.6°            |                            | 101  | 0.897                     |
| 9        | 70.4°            |                            | 101  | 1.119                     |
| 10       | 80.2°            |                            | 101  | 1.100                     |
| 11       | 90.0°            |                            | 101  | 1.000                     |
| 12       | 99.8°            |                            | 101  | 0.968                     |
| 13       | 109.6°           |                            | 101  | 0.933                     |
| 14       | 119.5°           |                            | 101  | 0.822                     |
| 15       | 129.6°           |                            | 101  | 0.868                     |
| 16       | 138.8°           |                            | 101  | 65.771                    |
| 17       | 147.4°           |                            | 101  | 1.383                     |
| 18       | 155.4°           |                            | 101  | 1.041                     |

**RI Instrument:** rEX

**Temperature:** 35.0 °C

**Physical Instrument Name:** Optilab T-rEX

**Calibration Constant:**  $3.4484 \times 10^{-5}$  RIU/pixel

**Solvent:** thf

**Temperature Correction Enabled:** yes

**Refractive Index:** 1.401

## Processing

### Peak settings:

|                             |                 |
|-----------------------------|-----------------|
| Peak Name                   | Peak 1          |
| Peak Limits (min)           | 16.636 - 22.977 |
| Light Scattering Model      | Zimm            |
| Fit Degree                  | 1               |
| dn/dc (mL/g)                | 0.1761          |
| A2 (mol mL/g <sup>2</sup> ) | 0.000           |
| UV Ext. Coef. (mL/(mg cm))  | 0.000           |

## Results

### Peak Results

|                                   | Peak 1                          |
|-----------------------------------|---------------------------------|
| <b>Masses</b>                     |                                 |
| Injected Mass (µg)                | 300.00                          |
| Calculated Mass (µg)              | 260.77                          |
| Mass Recovery (%)                 | 86.9                            |
| Mass Fraction (%)                 | 100.0                           |
| <b>Molar mass moments (g/mol)</b> |                                 |
| Mn                                | 6.739×10 <sup>3</sup> (±5.378%) |
| Mp                                | 1.096×10 <sup>4</sup> (±0.639%) |
| Mv                                | n/a                             |
| Mw                                | 1.472×10 <sup>4</sup> (±1.124%) |
| Mz                                | 3.075×10 <sup>4</sup> (±3.943%) |
| <b>Polydispersity</b>             |                                 |
| Mw/Mn                             | 2.185 (±5.495%)                 |
| Mz/Mn                             | 4.563 (±6.669%)                 |
| <b>rms radius moments (nm)</b>    |                                 |
| rn                                | n/a                             |
| rw                                | n/a                             |
| rz                                | 5.5 (±163.7%)                   |

## Polymer PHDC (2d)

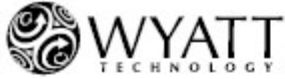

Sample: F148

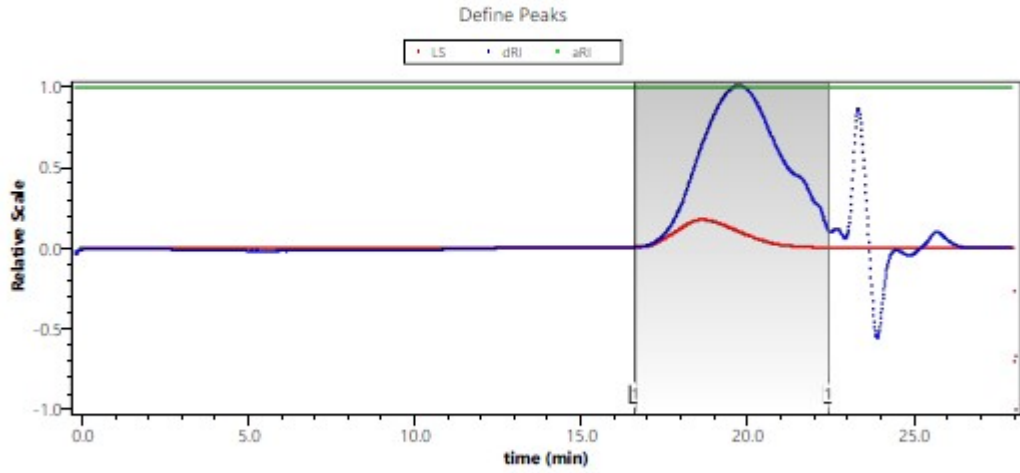

**Configuration**

Concentration Source: RI  
 Flow Rate: 1.000 mL/min

Light Scattering Instrument: DAWN EOS  
 Physical Instrument Name: DAWN EOS on COM3  
 Wavelength: 690.0 nm  
 Calibration Constant:  $9.3437 \times 10^{-6}$  1/(V cm)

| Detector | Refractive Index | Corrected Scattering Angle | Gain | Normalization Coefficient |
|----------|------------------|----------------------------|------|---------------------------|
| 1        | n/a              |                            | 101  | 1.000                     |
| 2        | 16.9°            |                            | 101  | 1.487                     |
| 3        | 23.2°            |                            | 101  | 1.162                     |
| 4        | 31.4°            |                            | 101  | 1.166                     |
| 5        | 38.8°            |                            | 101  | 1.349                     |
| 6        | 45.8°            |                            | 101  | 0.695                     |
| 7        | 53.8°            |                            | 101  | 0.812                     |
| 8        | 61.6°            |                            | 101  | 0.897                     |
| 9        | 70.4°            |                            | 101  | 1.119                     |
| 10       | 80.2°            |                            | 101  | 1.100                     |
| 11       | 90.0°            |                            | 101  | 1.000                     |
| 12       | 99.8°            |                            | 101  | 0.968                     |
| 13       | 109.6°           |                            | 101  | 0.933                     |
| 14       | 119.5°           |                            | 101  | 0.822                     |
| 15       | 129.6°           |                            | 101  | 0.868                     |
| 16       | 138.8°           |                            | 101  | 65.771                    |
| 17       | 147.4°           |                            | 101  | 1.383                     |
| 18       | 155.4°           |                            | 101  | 1.041                     |

RI Instrument: rEX  
 Temperature: 35.0 °C  
 Physical Instrument Name: Optilab T-rEX  
 Calibration Constant:  $3.4484 \times 10^{-5}$  RIU/pixel

Solvent: thf  
 Temperature Correction Enabled: yes  
 Refractive Index: 1.401

## Processing

### Peak settings:

|                                           |                 |
|-------------------------------------------|-----------------|
| Peak Name                                 | Peak 1          |
| Peak Limits (min)                         | 16.635 - 22.460 |
| Light Scattering Model                    | Zimm            |
| Fit Degree                                | 1               |
| dn/dc (mL/g)                              | 0.1761          |
| A2 (mol mL <sup>2</sup> g <sup>-2</sup> ) | 0.000           |
| UV Ext. Coef. (mL/(mg cm))                | 0.000           |

## Results

### Peak Results

|                                   | Peak 1                           |
|-----------------------------------|----------------------------------|
| <b>Masses</b>                     |                                  |
| Injected Mass (µg)                | 300.00                           |
| Calculated Mass (µg)              | 236.14                           |
| Mass Recovery (%)                 | 78.7                             |
| Mass Fraction (%)                 | 100.0                            |
| <b>Molar mass moments (g/mol)</b> |                                  |
| Mn                                | 7.126×10 <sup>3</sup> (±10.589%) |
| Mp                                | 1.368×10 <sup>4</sup> (±0.716%)  |
| Mv                                | n/a                              |
| Mw                                | 1.859×10 <sup>4</sup> (±1.164%)  |
| Mz                                | 3.758×10 <sup>4</sup> (±2.367%)  |
| <b>Polydispersity</b>             |                                  |
| Mw/Mn                             | 2.609 (±10.653%)                 |
| Mz/Mn                             | 5.274 (±10.850%)                 |
| <b>rms radius moments (nm)</b>    |                                  |
| rn                                | n/a                              |
| rw                                | n/a                              |
| rz                                | n/a                              |

## Polymer PBDC (2e)

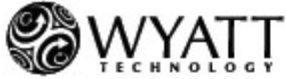

Sample: F150

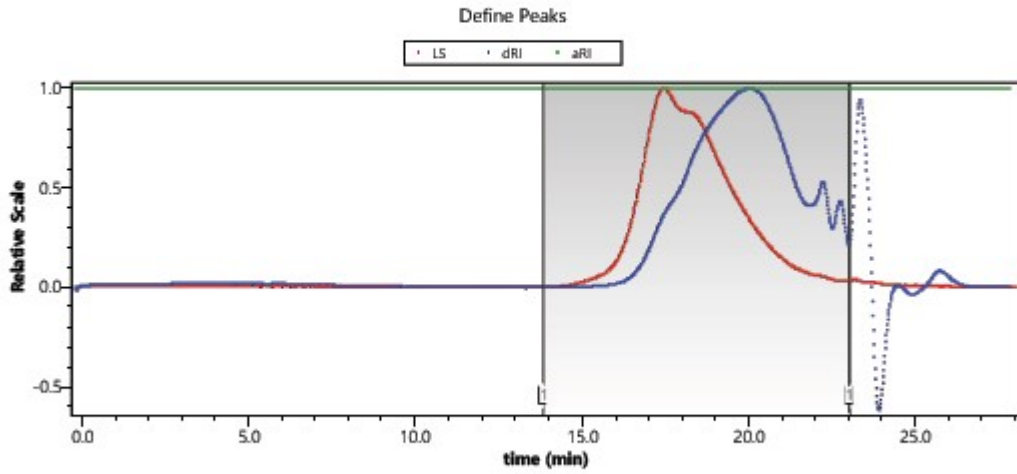

**Configuration**

**Concentration Source:** RI  
**Flow Rate:** 1.000 mL/min

**Light Scattering Instrument:** DAWN EOS  
**Physical Instrument Name:** DAWN EOS on COM3  
**Wavelength:** 690.0 nm  
**Calibration Constant:**  $9.3437 \times 10^{-6}$  1/(V cm)

| Detector | Refractive Index | Corrected Scattering Angle | Gain | Normalization Coefficient |
|----------|------------------|----------------------------|------|---------------------------|
| 1        | n/a              |                            | 101  | 1.000                     |
| 2        | 16.9°            |                            | 101  | 1.487                     |
| 3        | 23.2°            |                            | 101  | 1.162                     |
| 4        | 31.4°            |                            | 101  | 1.166                     |
| 5        | 38.8°            |                            | 101  | 1.349                     |
| 6        | 45.8°            |                            | 101  | 0.695                     |
| 7        | 53.8°            |                            | 101  | 0.812                     |
| 8        | 61.6°            |                            | 101  | 0.897                     |
| 9        | 70.4°            |                            | 101  | 1.119                     |
| 10       | 80.2°            |                            | 101  | 1.100                     |
| 11       | 90.0°            |                            | 101  | 1.000                     |
| 12       | 99.8°            |                            | 101  | 0.968                     |
| 13       | 109.6°           |                            | 101  | 0.933                     |
| 14       | 119.5°           |                            | 101  | 0.822                     |
| 15       | 129.6°           |                            | 101  | 0.868                     |
| 16       | 138.8°           |                            | 101  | 65.771                    |
| 17       | 147.4°           |                            | 101  | 1.383                     |
| 18       | 155.4°           |                            | 101  | 1.041                     |

**RI Instrument:** rEX  
**Temperature:** 35.0 °C  
**Physical Instrument Name:** Optilab T-rEX  
**Calibration Constant:**  $3.4484 \times 10^{-5}$  RIU/pixel

**Solvent:** thf  
**Temperature Correction Enabled:** yes  
**Refractive Index:** 1.401

## Processing

### Peak settings:

|                             |                 |
|-----------------------------|-----------------|
| Peak Name                   | Peak 1          |
| Peak Limits (min)           | 13.872 - 23.040 |
| Light Scattering Model      | Zimm            |
| Fit Degree                  | 1               |
| dn/dc (mL/g)                | 0.1761          |
| A2 (mol mL/g <sup>2</sup> ) | 0.000           |
| UV Ext. Coef. (mL/(mg cm))  | 0.000           |

## Results

### Peak Results

|                                   | Peak 1                          |
|-----------------------------------|---------------------------------|
| <b>Masses</b>                     |                                 |
| Injected Mass (µg)                | 300.00                          |
| Calculated Mass (µg)              | 317.72                          |
| Mass Recovery (%)                 | 105.9                           |
| Mass Fraction (%)                 | 100.0                           |
| <b>Molar mass moments (g/mol)</b> |                                 |
| Mn                                | 2.251×10 <sup>4</sup> (±1.234%) |
| Mp                                | 2.530×10 <sup>4</sup> (±0.481%) |
| Mv                                | n/a                             |
| Mw                                | 6.054×10 <sup>4</sup> (±0.335%) |
| Mz                                | 1.784×10 <sup>5</sup> (±1.009%) |
| <b>Polydispersity</b>             |                                 |
| Mw/Mn                             | 2.690 (±1.279%)                 |
| Mz/Mn                             | 7.926 (±1.594%)                 |
| <b>rms radius moments (nm)</b>    |                                 |
| rn                                | 6.6 (±132.6%)                   |
| rw                                | 9.5 (±34.5%)                    |
| rz                                | 13.1 (±9.4%)                    |

## Polymer PBMDc (2f)

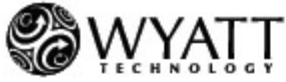

Sample: F154

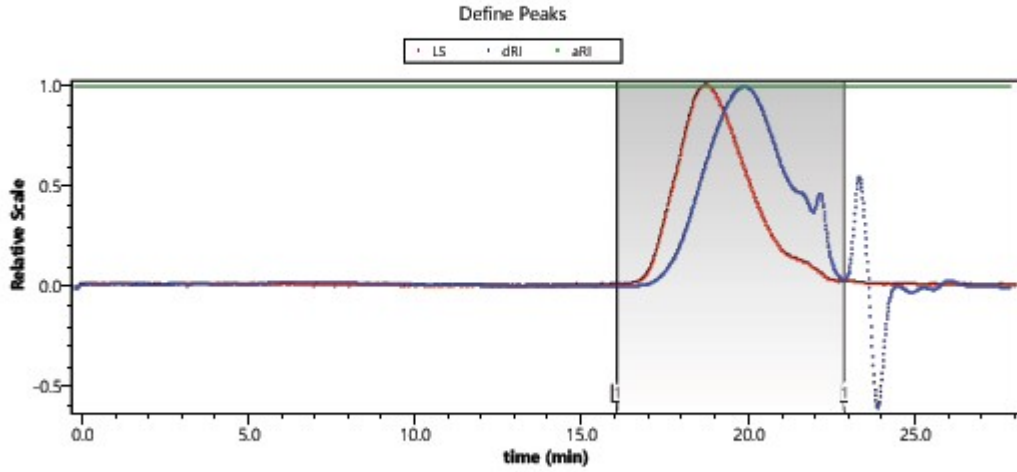

**Configuration**

Concentration Source: RI  
 Flow Rate: 1.000 mL/min

Light Scattering Instrument: DAWN EOS  
 Physical Instrument Name: DAWN EOS on COM3  
 Wavelength: 690.0 nm  
 Calibration Constant:  $9.3437 \times 10^{-6}$  1/(V cm)

| Detector | Refractive Index | Corrected Scattering Angle | Gain | Normalization Coefficient |
|----------|------------------|----------------------------|------|---------------------------|
| 1        | n/a              |                            | 101  | 1.000                     |
| 2        | 16.9°            |                            | 101  | 1.487                     |
| 3        | 23.2°            |                            | 101  | 1.162                     |
| 4        | 31.4°            |                            | 101  | 1.166                     |
| 5        | 38.8°            |                            | 101  | 1.349                     |
| 6        | 45.8°            |                            | 101  | 0.695                     |
| 7        | 53.8°            |                            | 101  | 0.812                     |
| 8        | 61.6°            |                            | 101  | 0.897                     |
| 9        | 70.4°            |                            | 101  | 1.119                     |
| 10       | 80.2°            |                            | 101  | 1.100                     |
| 11       | 90.0°            |                            | 101  | 1.000                     |
| 12       | 99.8°            |                            | 101  | 0.968                     |
| 13       | 109.6°           |                            | 101  | 0.933                     |
| 14       | 119.5°           |                            | 101  | 0.822                     |
| 15       | 129.6°           |                            | 101  | 0.868                     |
| 16       | 138.8°           |                            | 101  | 65.771                    |
| 17       | 147.4°           |                            | 101  | 1.383                     |
| 18       | 155.4°           |                            | 101  | 1.041                     |

RI Instrument: rEX  
 Temperature: 35.0 °C  
 Physical Instrument Name: Optilab T-rEX  
 Calibration Constant:  $3.4484 \times 10^{-5}$  RIU/pixel

Solvent: thf  
 Temperature Correction Enabled: yes  
 Refractive Index: 1.401

## Processing

### Peak settings:

|                             |                 |
|-----------------------------|-----------------|
| Peak Name                   | Peak 1          |
| Peak Limits (min)           | 16.072 - 22.880 |
| Light Scattering Model      | Zimm            |
| Fit Degree                  | 1               |
| dn/dc (mL/g)                | 0.1761          |
| A2 (mol mL/g <sup>2</sup> ) | 0.000           |
| UV Ext. Coef. (mL/mg cm)    | 0.000           |

## Results

### Peak Results

|                                   | Peak 1                          |
|-----------------------------------|---------------------------------|
| <b>Masses</b>                     |                                 |
| Injected Mass (µg)                | 300.00                          |
| Calculated Mass (µg)              | 283.84                          |
| Mass Recovery (%)                 | 94.6                            |
| Mass Fraction (%)                 | 100.0                           |
| <b>Molar mass moments (g/mol)</b> |                                 |
| Mn                                | 1.377×10 <sup>4</sup> (±2.010%) |
| Mp                                | 1.730×10 <sup>4</sup> (±0.623%) |
| Mv                                | n/a                             |
| Mw                                | 2.533×10 <sup>4</sup> (±0.806%) |
| Mz                                | 5.501×10 <sup>4</sup> (±3.096%) |
| <b>Polydispersity</b>             |                                 |
| Mw/Mn                             | 1.840 (±2.165%)                 |
| Mz/Mn                             | 3.996 (±3.691%)                 |
| <b>rms radius moments (nm)</b>    |                                 |
| rn                                | 23.8 (±17.7%)                   |
| rw                                | 19.4 (±16.7%)                   |
| rz                                | 16.9 (±14.2%)                   |



## 11. $^1\text{H}$ and $^{13}\text{C}$ NMR Spectra

$^1\text{H}$  NMR (400 MHz,  $\text{CDCl}_3$ ) spectrum of product 1a

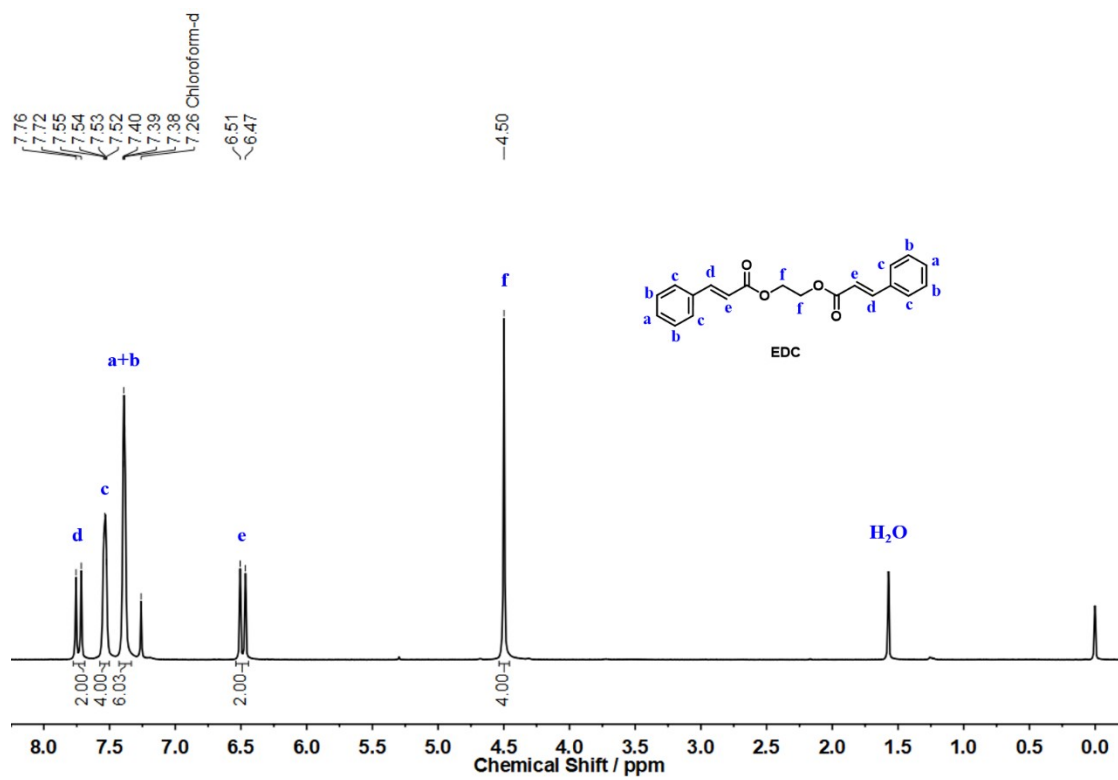

$^{13}\text{C}$  NMR (100 MHz,  $\text{CDCl}_3$ ) spectrum of product 1a

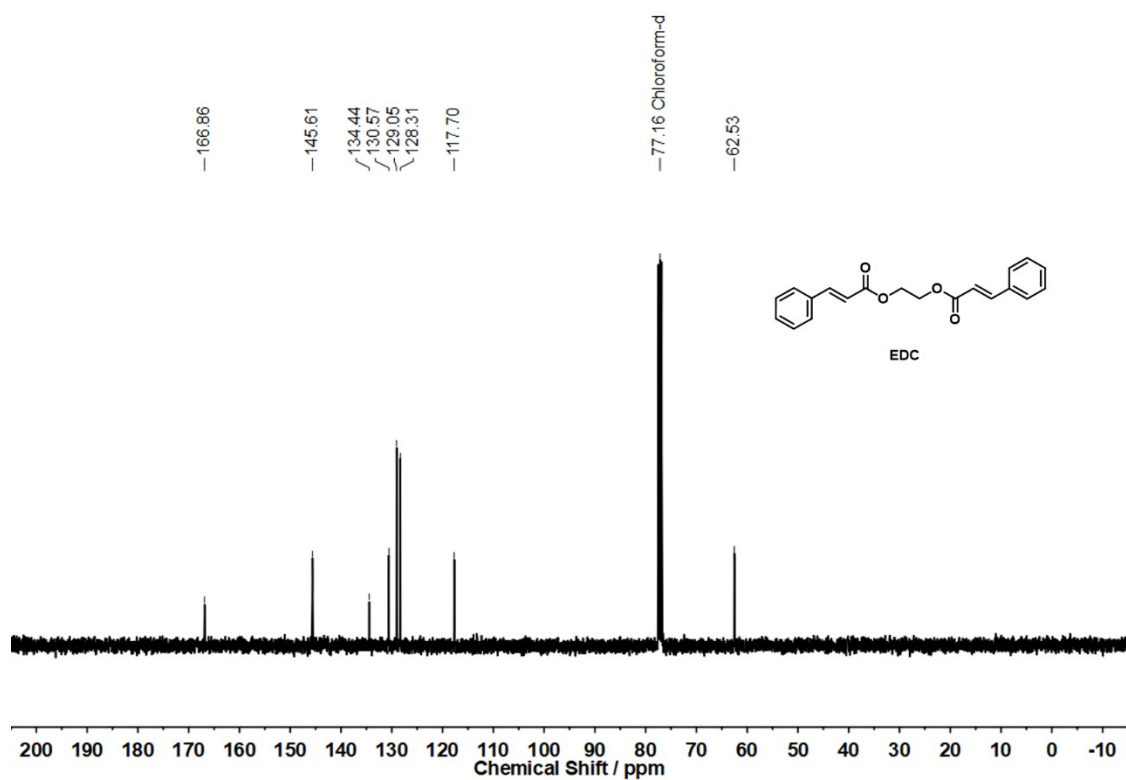

<sup>1</sup>H NMR (400 MHz, CDCl<sub>3</sub>) spectrum of product 1b

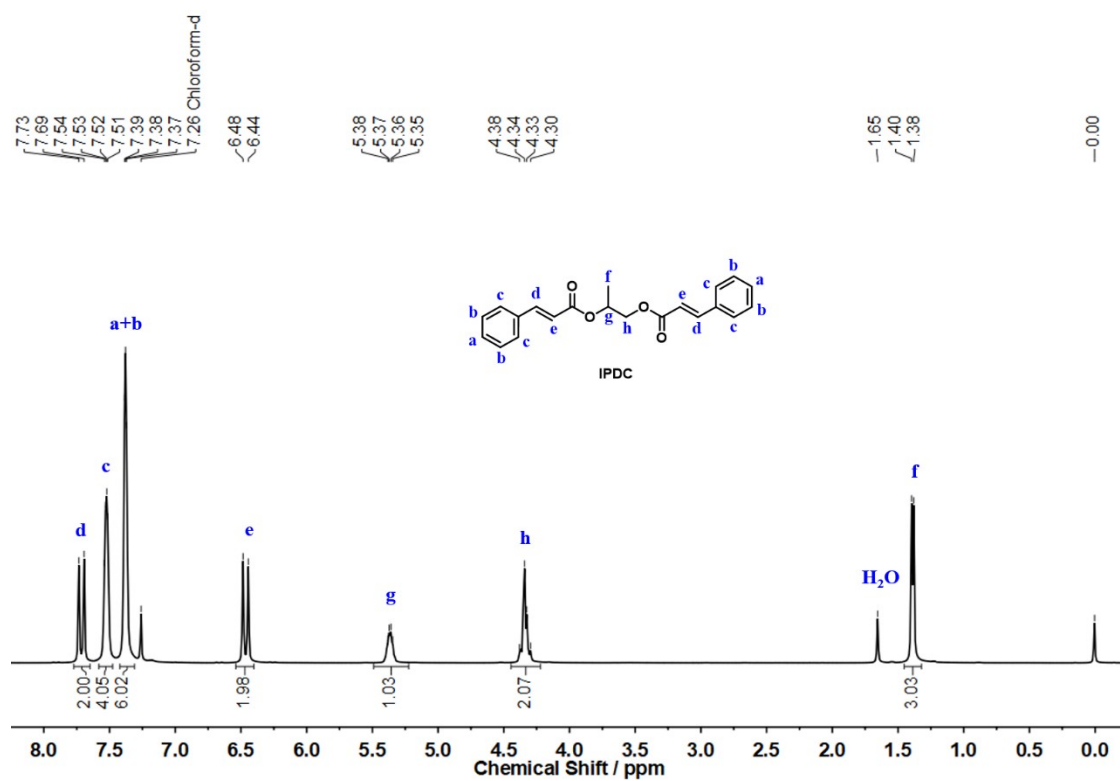

<sup>13</sup>C NMR (100 MHz, CDCl<sub>3</sub>) spectrum of product 1b

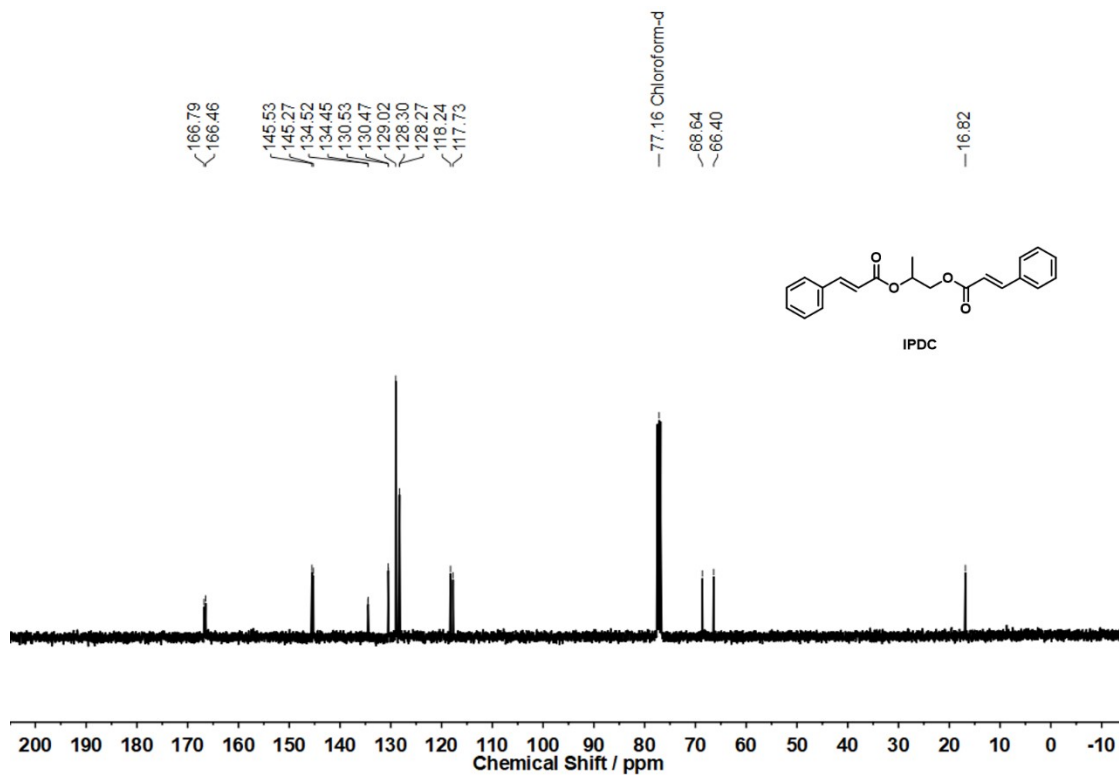

<sup>1</sup>H NMR (400 MHz, CDCl<sub>3</sub>) spectrum of product 1c

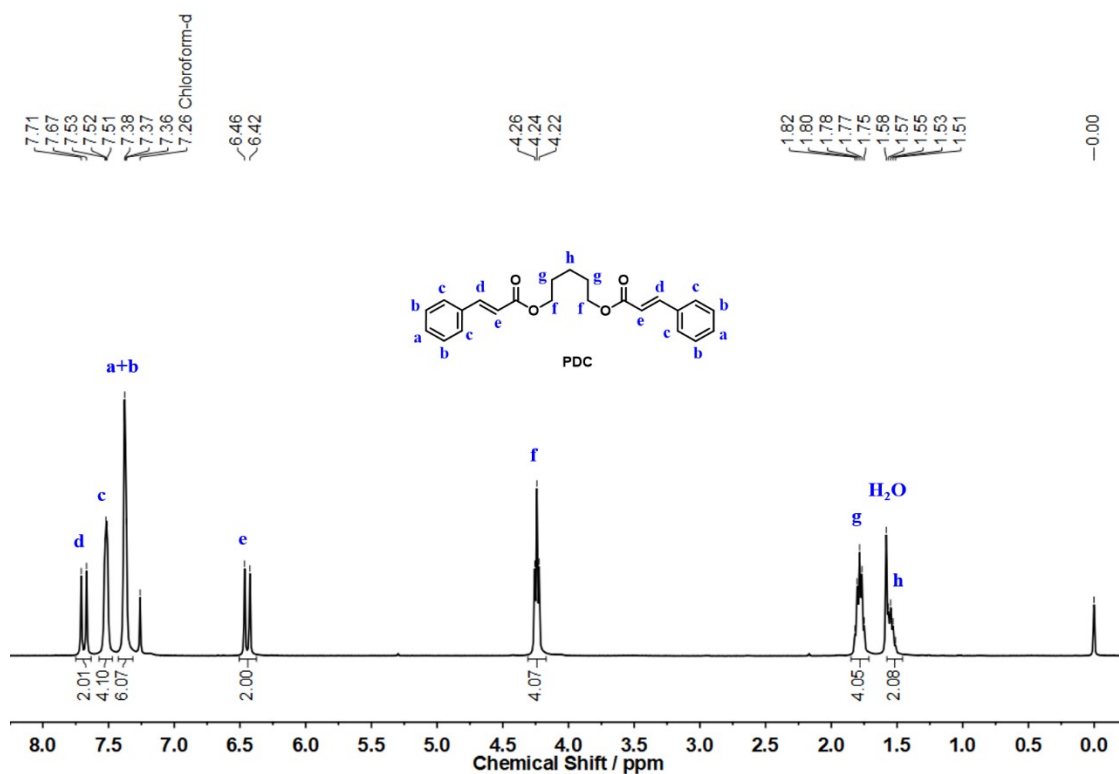

<sup>13</sup>C NMR (100 MHz, CDCl<sub>3</sub>) spectrum of product 1c

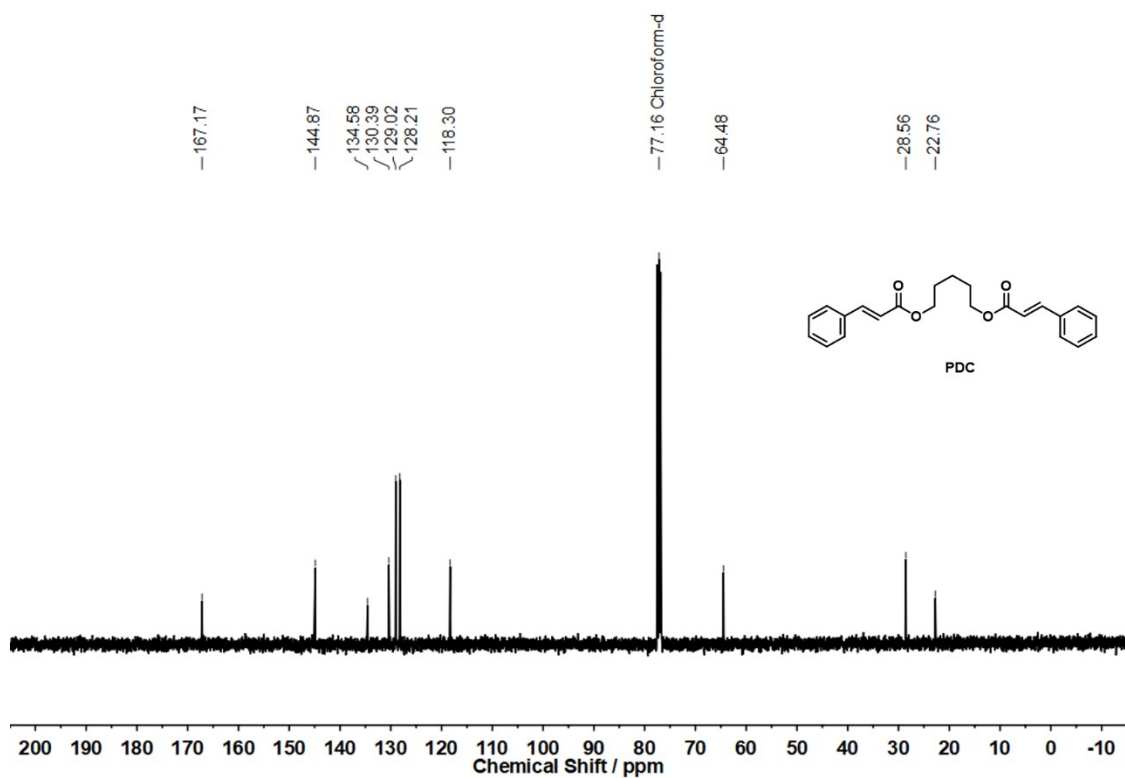

<sup>1</sup>H NMR (400 MHz, CDCl<sub>3</sub>) spectrum of product 1d

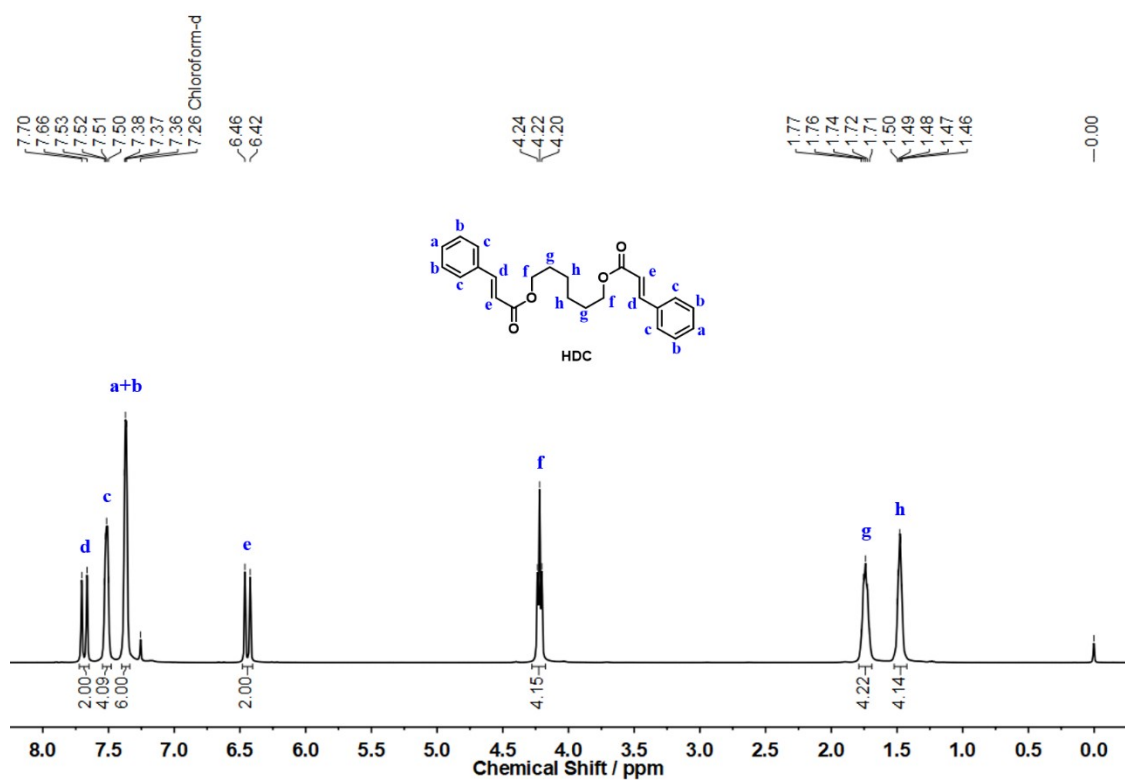

<sup>13</sup>C NMR (100 MHz, CDCl<sub>3</sub>) spectrum of product 1d

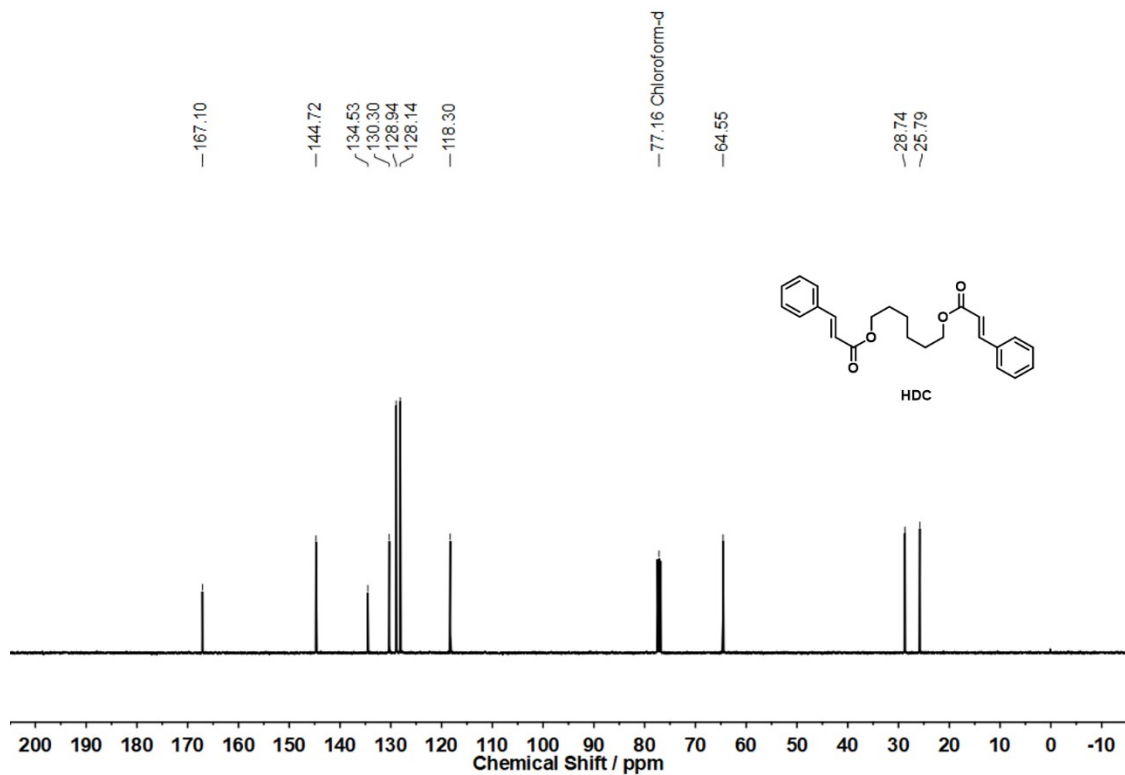

<sup>1</sup>H NMR (400 MHz, CDCl<sub>3</sub>) spectrum of product 1e

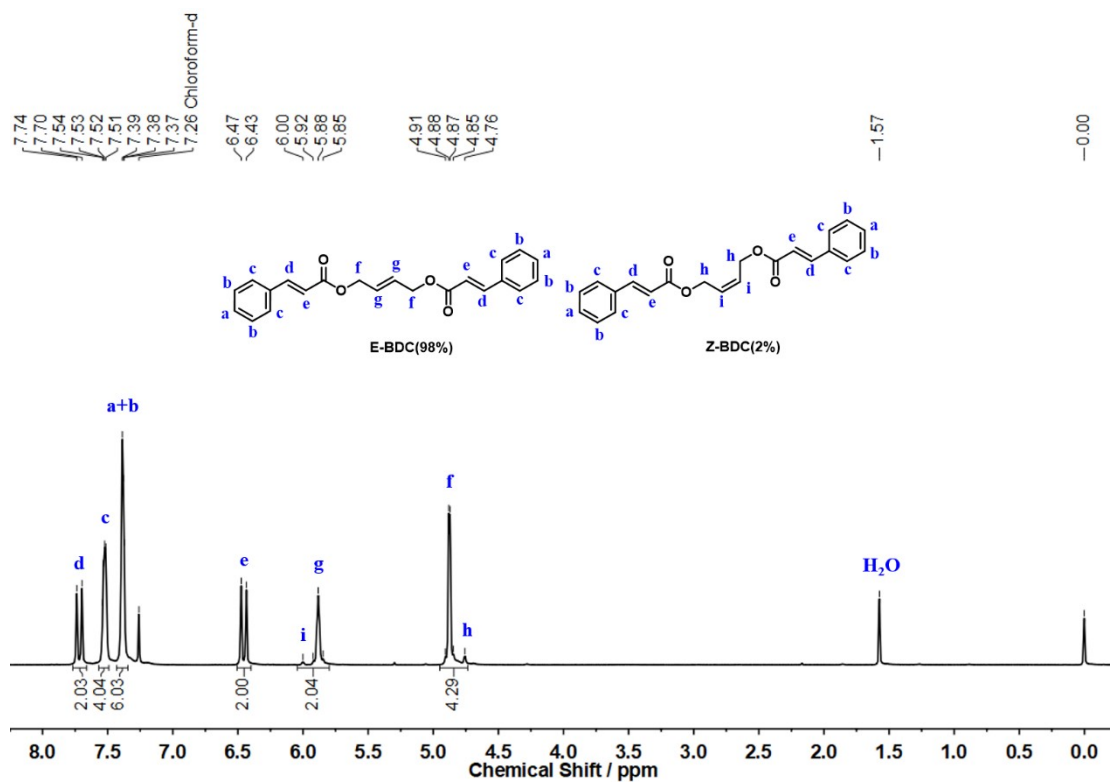

<sup>13</sup>C NMR (100 MHz, CDCl<sub>3</sub>) spectrum of product 1e

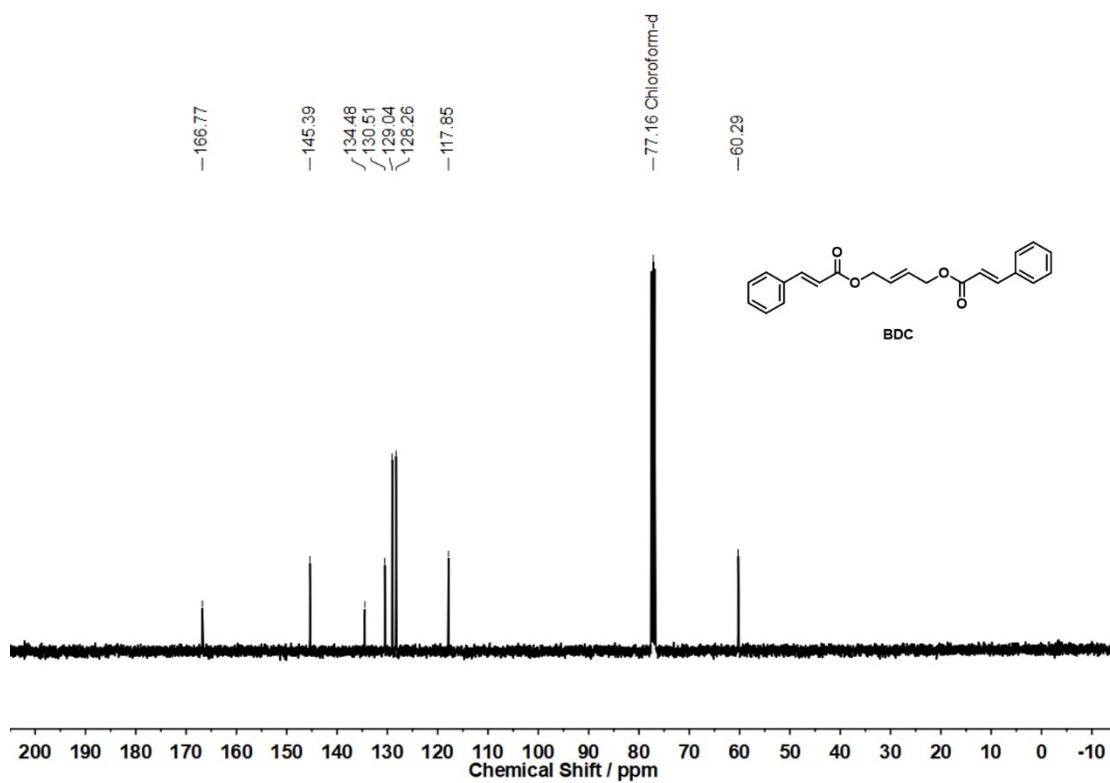

<sup>1</sup>H NMR (400 MHz, CDCl<sub>3</sub>) spectrum of product 1f

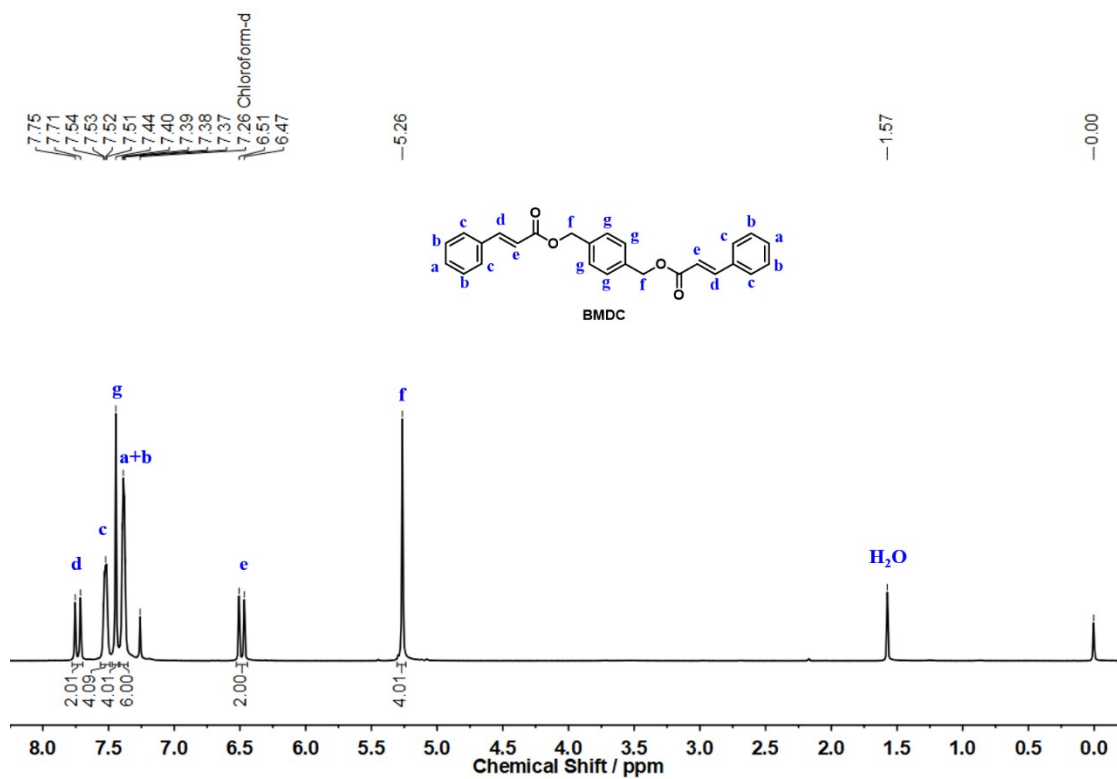

<sup>13</sup>C NMR (100 MHz, CDCl<sub>3</sub>) spectrum of product 1f

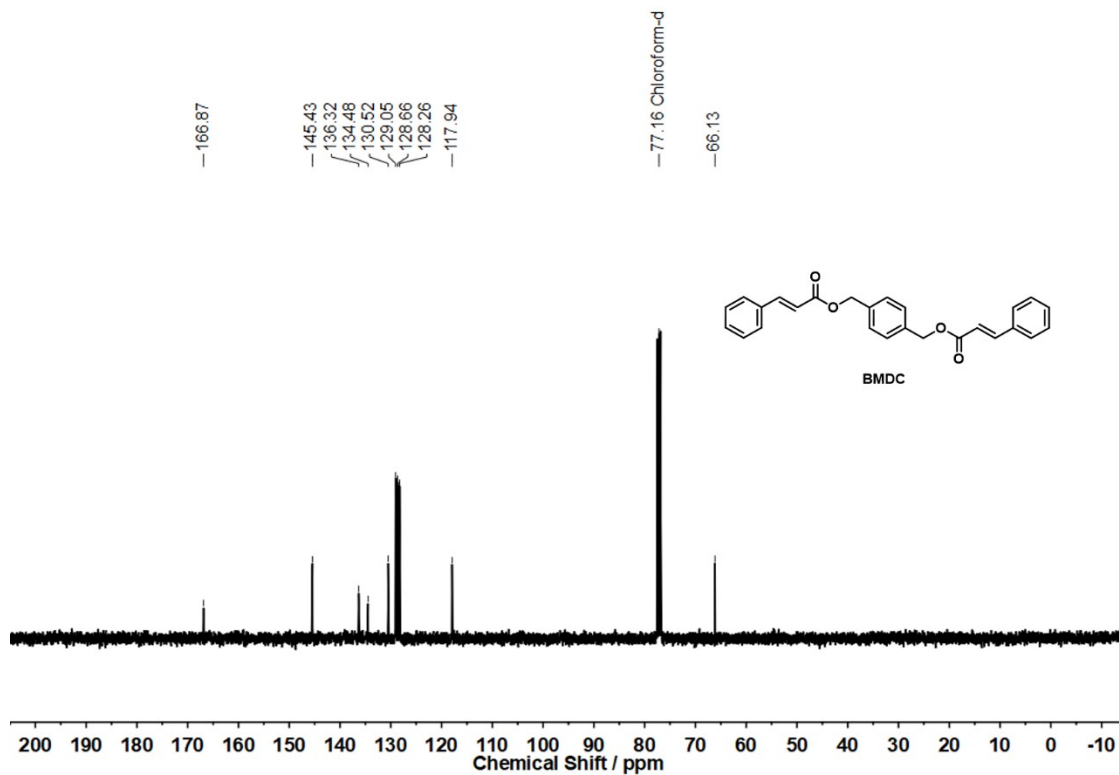

<sup>1</sup>H NMR (400 MHz, CDCl<sub>3</sub>) spectrum of HMC

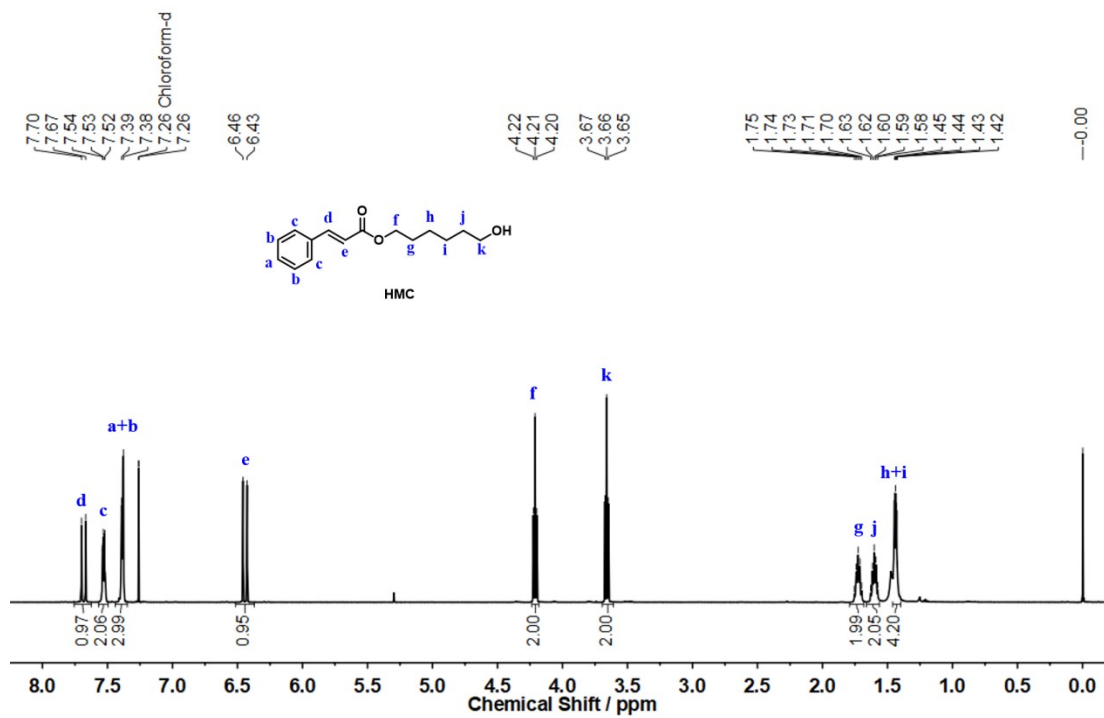

<sup>13</sup>C NMR (100 MHz, CDCl<sub>3</sub>) spectrum of HMC

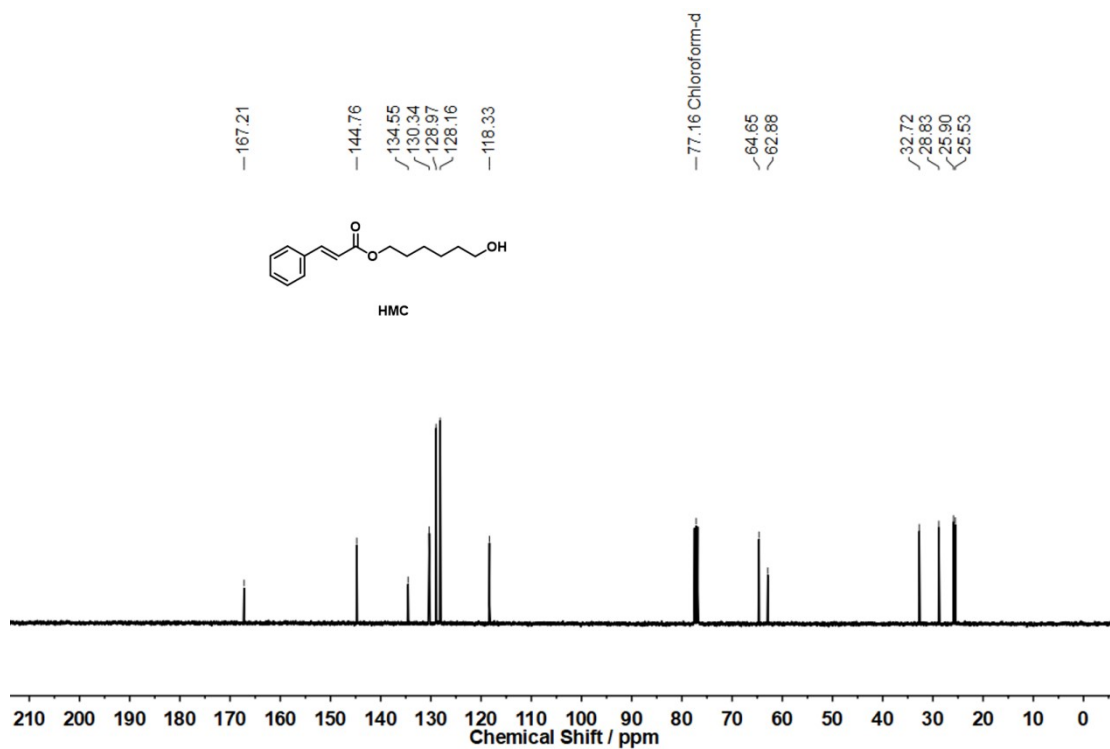

<sup>1</sup>H NMR (400 MHz, CDCl<sub>3</sub>) spectrum of polymer 2a

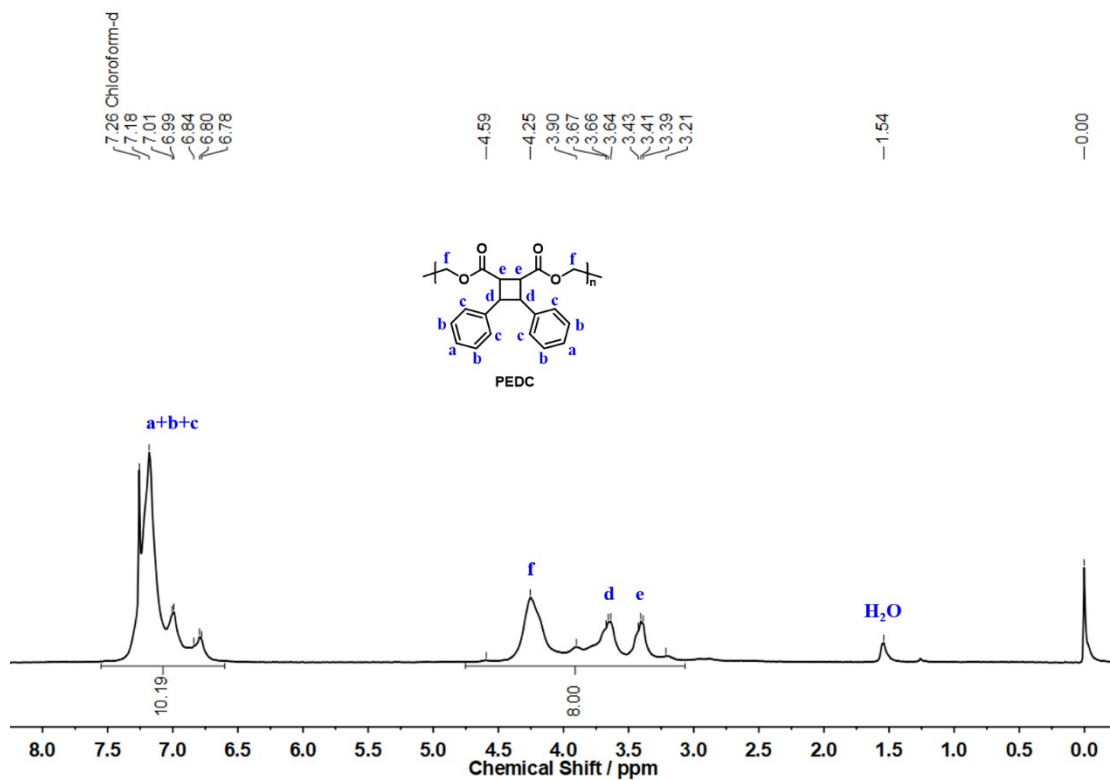

<sup>1</sup>H NMR (400 MHz, CDCl<sub>3</sub>) spectrum of polymer 2b



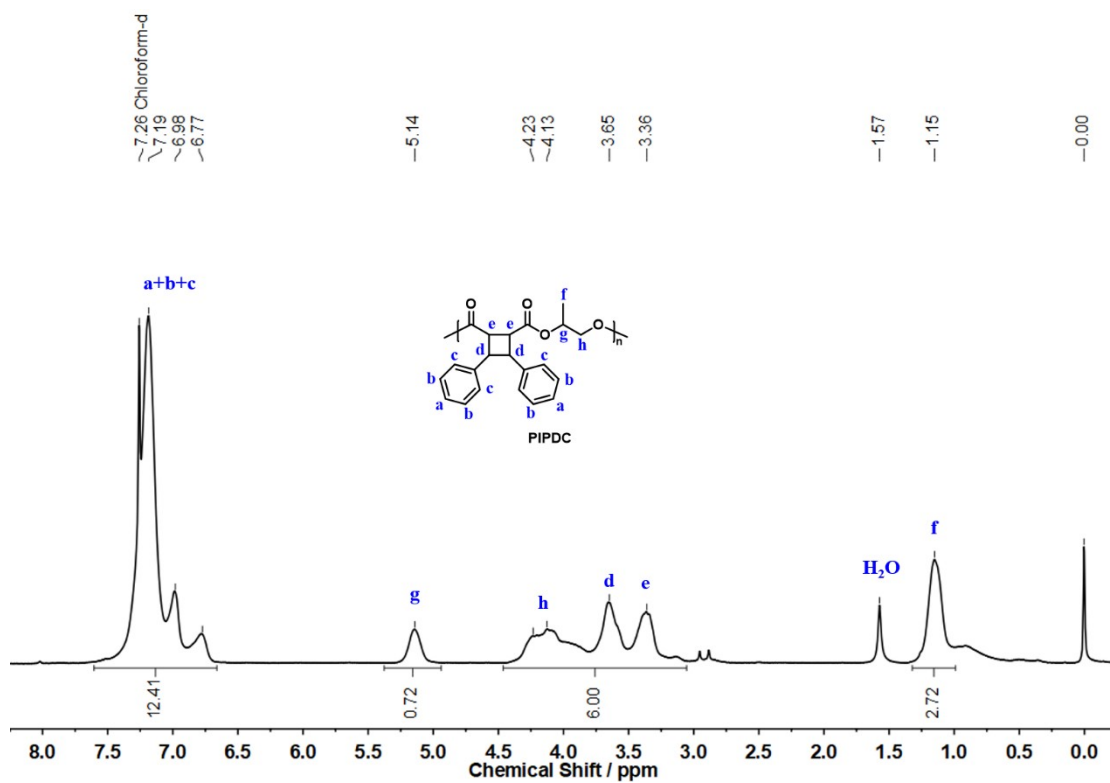

<sup>1</sup>H NMR (400 MHz, CDCl<sub>3</sub>) spectrum of polymer 2c

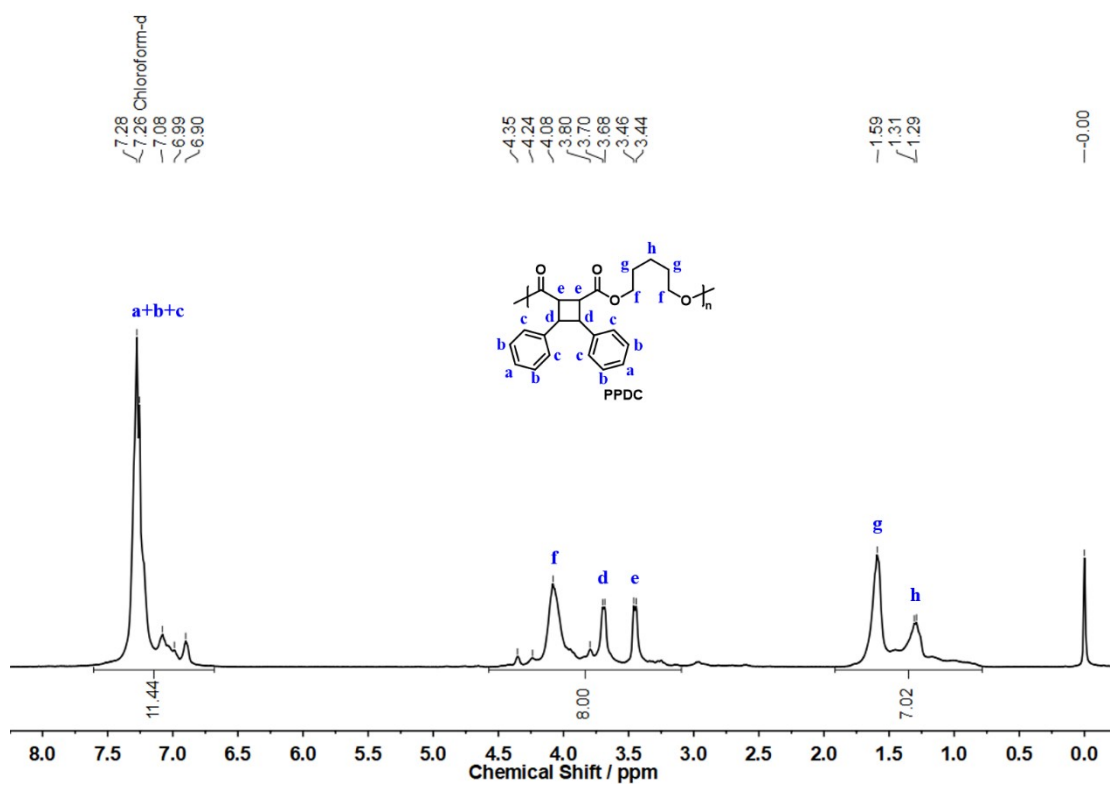

<sup>1</sup>H NMR (400 MHz, CDCl<sub>3</sub>) spectrum of polymer 2d

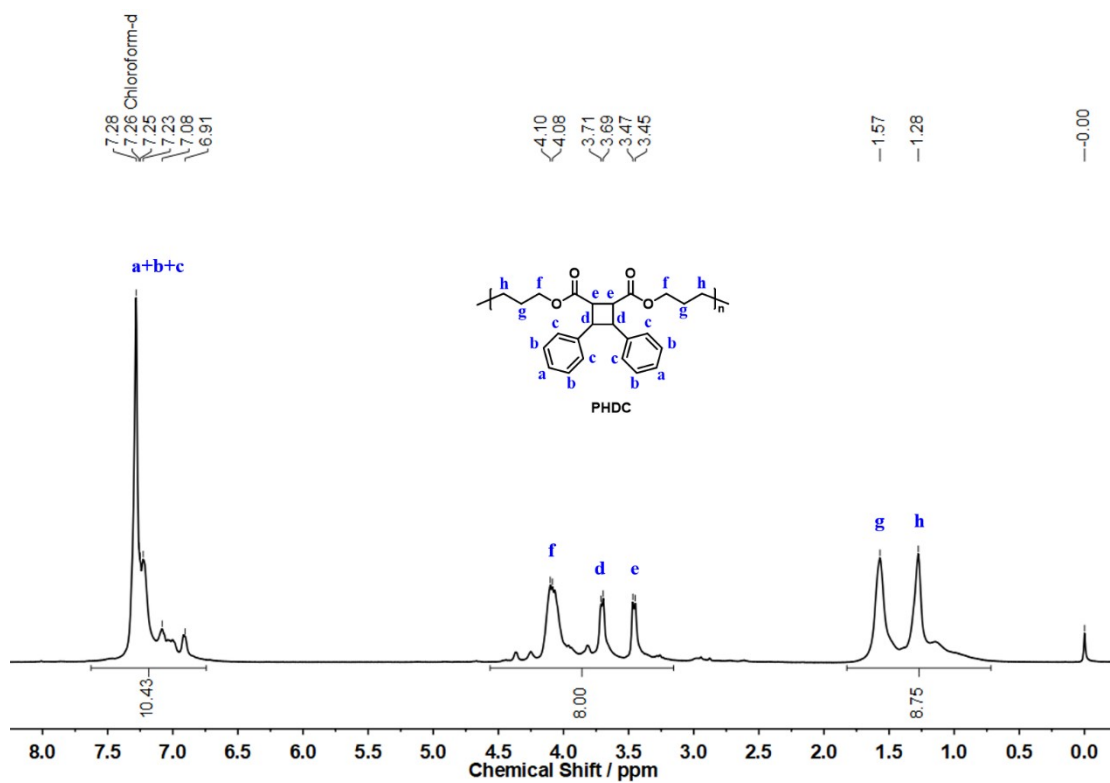

<sup>1</sup>H NMR (400 MHz, CDCl<sub>3</sub>) spectrum of polymer 2e

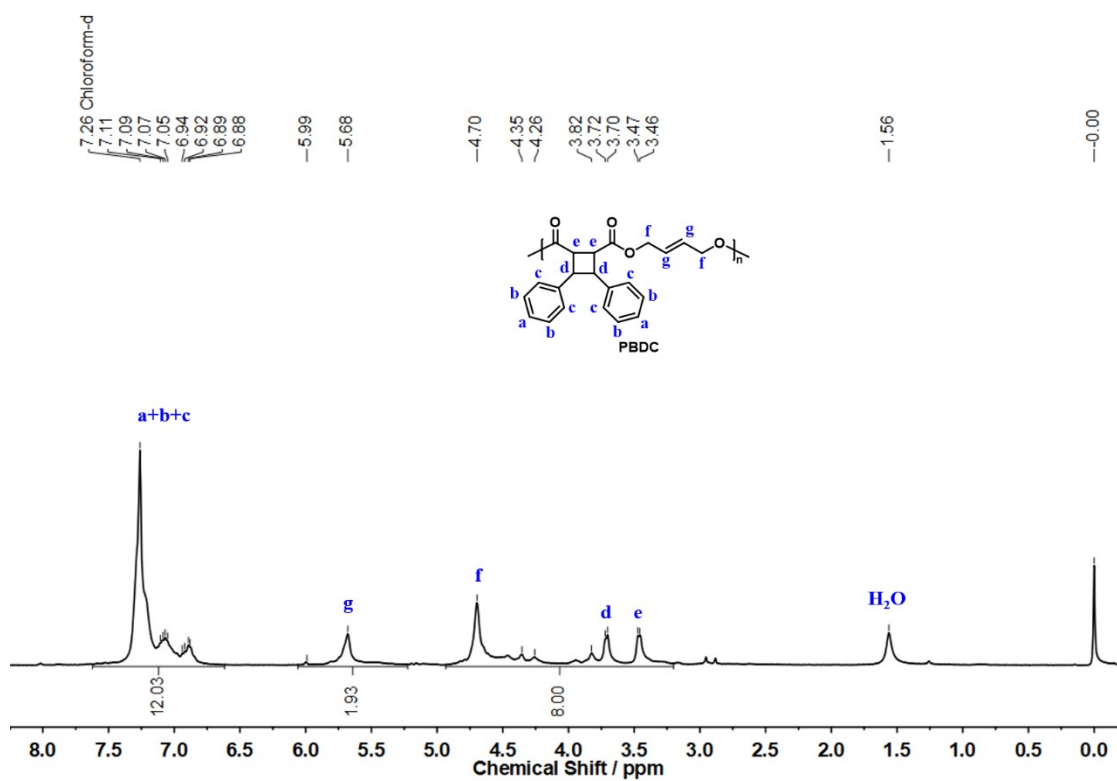

<sup>1</sup>H NMR (400 MHz, CDCl<sub>3</sub>) spectrum of polymer 2f

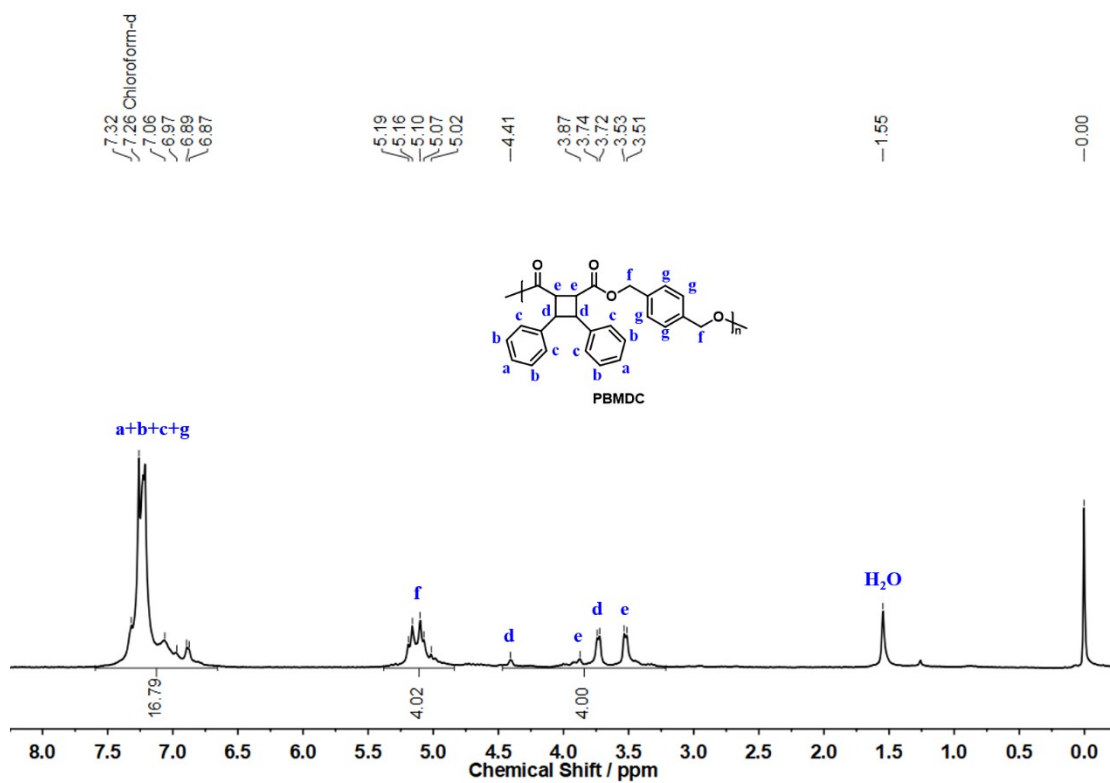

**<sup>1</sup>H NMR (400 MHz, CDCl<sub>3</sub>) spectrum of dimer of Ethyl Cinnamates**

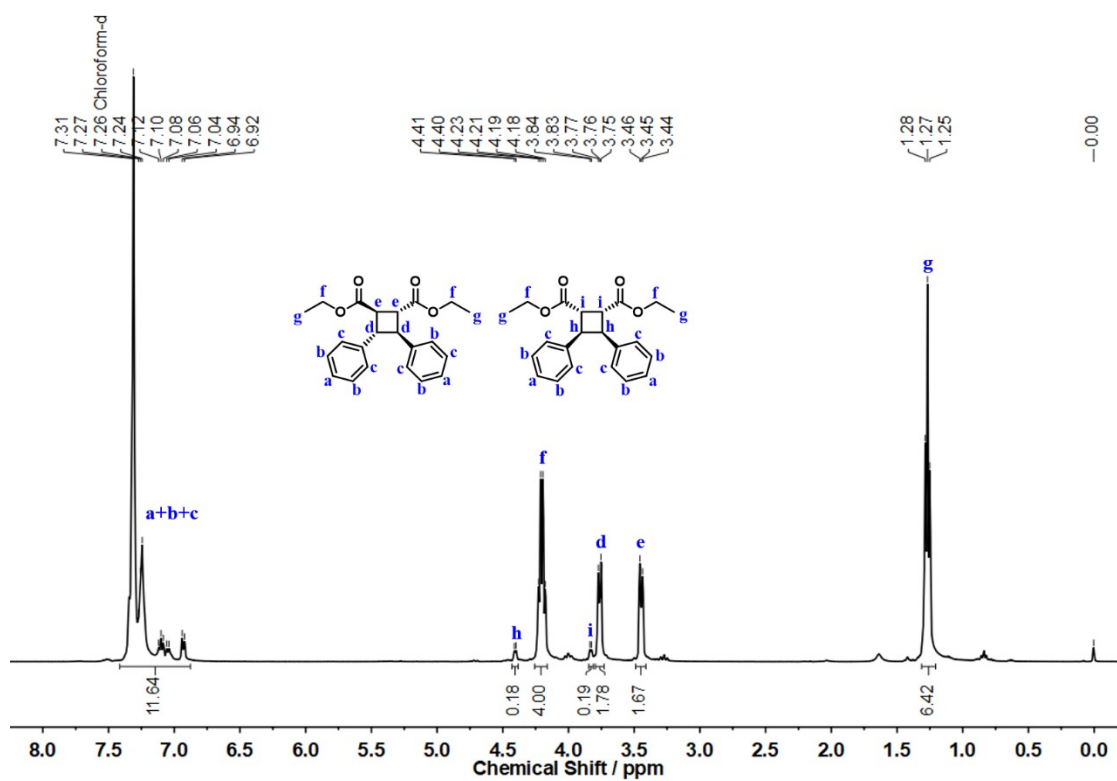

## 12. Thermal Stability Analyses

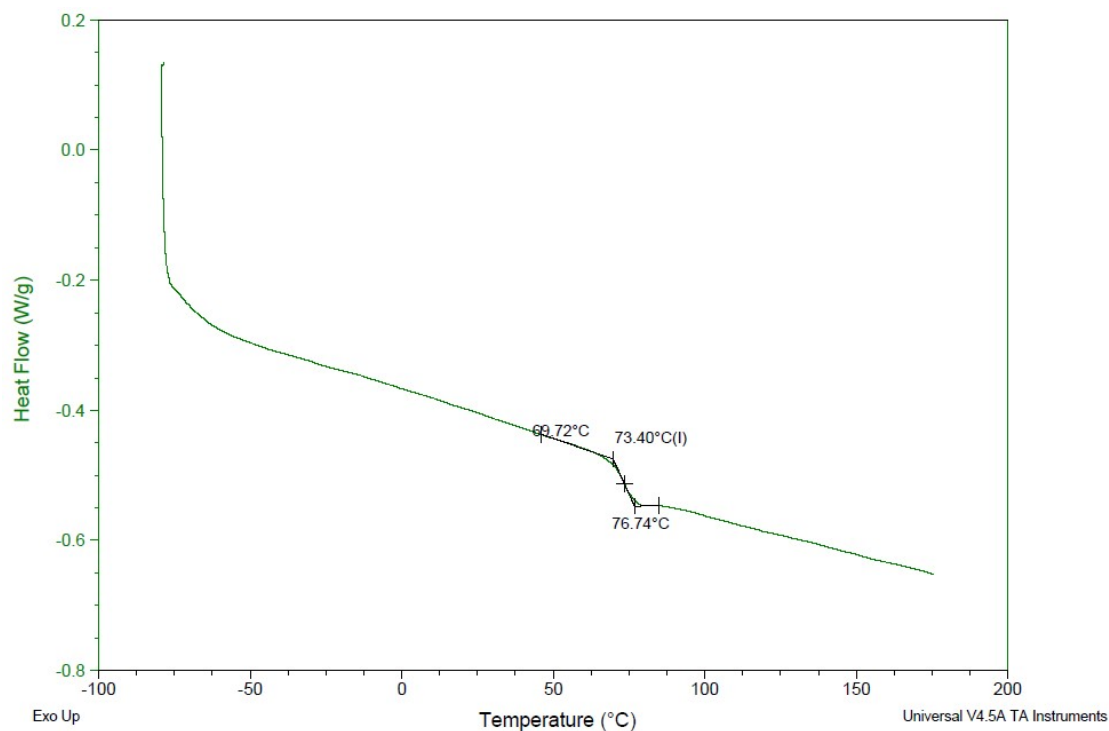

Figure S8 Representative DSC curves for isotactic PEDC during the second heat at a temperature ramp rate of 10 °C/min.

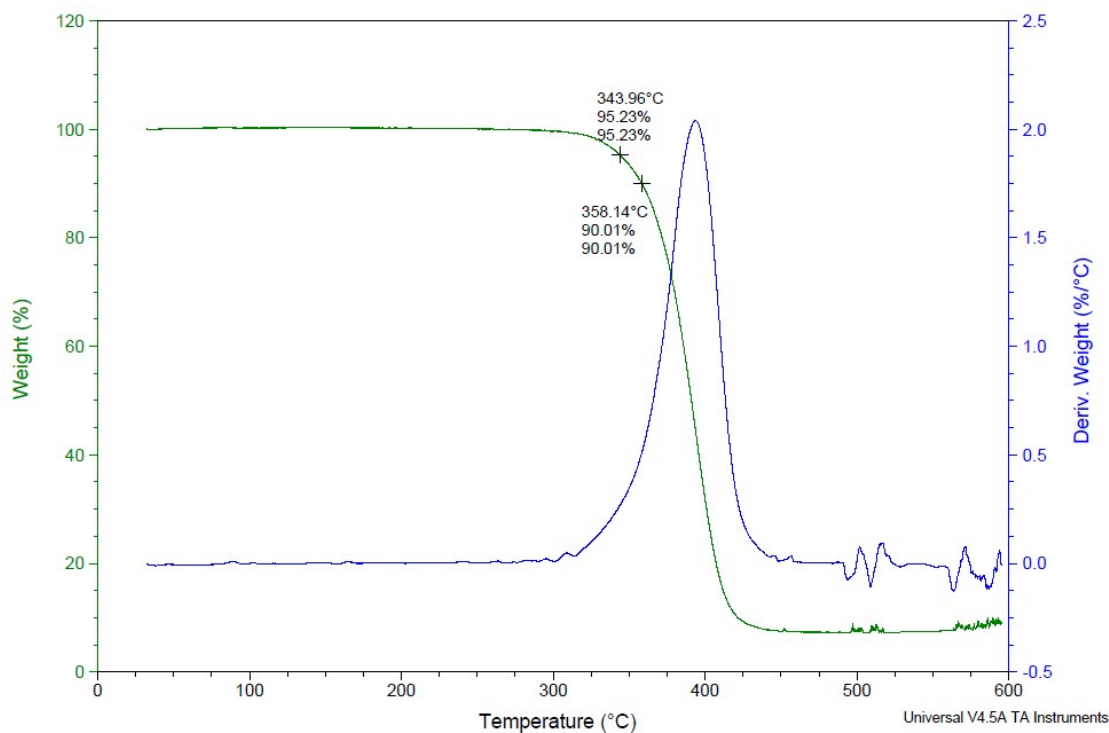

Figure S9 Representative TGA and DTG curves for isotactic PEDC

### 13. Preparation of Polymer Thin Films

The copolymers were dried in a vacuum oven at 100 °C for 1 h. The dry copolymer was then placed in a flat mold (thickness, 0.7 mm) between two Kapton films. These films were then placed between two steel plates. Subsequently, the two steel plates were placed under a plate vulcanizer at 100 °C and the film was formed using a pressure of 2 MPa. After hot-pressing, the mold was quickly quenched in cold water to produce the transparent copolyester film with a thickness of  $0.7 \pm 0.01\text{mm}$ .<sup>2-3</sup>

### 14. Tensile Properties and Process of Polymer Films

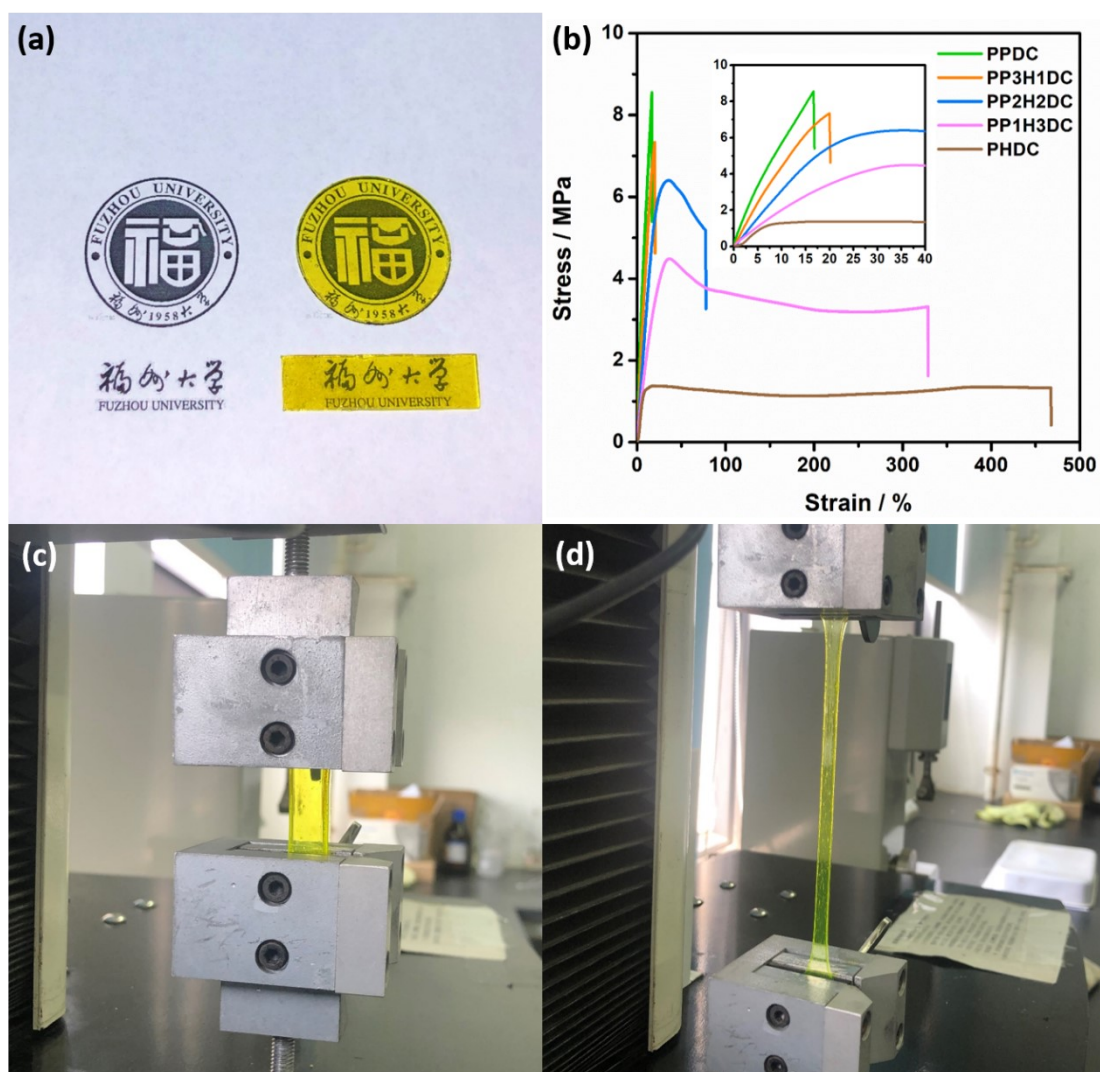

Figure S10 the tensile process of poly (hexylene glycol dicinnamate) (PHDC).

| Copolymer | Young's modulus<br>( $E$ , MPa) | Maximum tensile<br>strength ( $\sigma_m$ , MPa) | Elongation at<br>break ( $\varepsilon_b$ , %) |
|-----------|---------------------------------|-------------------------------------------------|-----------------------------------------------|
| PPDC      | 48.5±4.3                        | 8.6±1.2                                         | 16.6±3.0                                      |
| PP3H1DC   | 37.3±2.3                        | 7.4±1.3                                         | 20.0±6.5                                      |
| PP2H2DC   | 29.0±3.2                        | 6.4±2.4                                         | 77.3±12.6                                     |
| PP1H3DC   | 15.6±1.8                        | 4.5±0.8                                         | 328.5±34.6                                    |
| PHDC      | 16.9±2.7                        | 1.4±0.4                                         | 468.8±58.7                                    |

Table S5 Tensile properties of polymer

## 15. Reference

1. Dong, J., Sharpless, K. B., Kwisnek, L., Oakdale, J. S. & Fokin, V. V. SuFEx-based synthesis of polysulfates. *Angew. Chem., Int. Ed.* **53**, 9466-9470 (2014).
2. Teator, A. J. & Leibfarth, F. A. Catalyst-controlled stereoselective cationic polymerization of vinyl ethers. *Science* **363**, 1439-1443 (2019).
3. Ding, L., Liu, L., Chen, Y., Du, Y., Guan, S., Bai, Y. & Huang, Y. Modification of poly(ethylene terephthalate) by copolymerization of plant-derived  $\alpha$ -truxillic acid with excellent ultraviolet shielding and mechanical properties. *Chem. Eng. J.* **374**, 1317-1325 (2019).
